# Supplementary material for: Deterministically selected rare taxa drive changes in community composition in drinking water biological activated carbon filters
Source: Research Square preprint supplement (doi:10.21203/rs.3.rs-7095012/v1), 2025-09-04
Supplement: Supplementary file 2 [file 4f528833b12b8a222ec42f29.xlsx]

## Sheet: Differential abundance taxonomy
Differential abundance plot taxonomy (Figure 5)
ASV	Phylum	Class	Order	Family	Genus	Species
ASV_899	Proteobacteria	Alphaproteobacteria	Rhizobiales	Beijerinckiaceae	Bosea	Bosea_sp.
ASV_844	Sumerlaeota	Sumerlaeia	Sumerlaeales	Sumerlaeaceae	Sumerlaea	unknown
ASV_82	Proteobacteria	Alphaproteobacteria	Rhodospirillales	unknown	unknown	metagenome
ASV_792	Gemmatimonadota	BD2-11_terrestrial_group	BD2-11_terrestrial_group	BD2-11_terrestrial_group	BD2-11_terrestrial_group	metagenome
ASV_753	Hydrogenedentes	Hydrogenedentia	Hydrogenedentiales	Hydrogenedensaceae	Hydrogenedensaceae	metagenome
ASV_736	Bacteroidota	Bacteroidia	Chitinophagales	unknown	unknown	unknown
ASV_723	Planctomycetota	Planctomycetes	Planctomycetales	Schlesneriaceae	Schlesneria	unknown
ASV_72	Proteobacteria	Alphaproteobacteria	Rhizobiales	Xanthobacteraceae	Afipia	unknown
ASV_709	Verrucomicrobiota	Chlamydiae	Chlamydiales	Simkaniaceae	unknown	Rhabdochlamydiaceae_bacterium
ASV_698	Proteobacteria	Alphaproteobacteria	Rhizobiales	Xanthobacteraceae	Bradyrhizobium	Bradyrhizobium_sp.
ASV_67	Proteobacteria	Gammaproteobacteria	Salinisphaerales	Solimonadaceae	Nevskia	Nevskia_soli
ASV_6	Proteobacteria	Gammaproteobacteria	Tenderiales	Tenderiaceae	Candidatus_Tenderia	unknown
ASV_588	Verrucomicrobiota	Verrucomicrobiae	Opitutales	Opitutaceae	Lacunisphaera	metagenome
ASV_56	Proteobacteria	Alphaproteobacteria	Rhizobiales	Xanthobacteraceae	Pseudolabrys	unknown
ASV_545	Actinobacteriota	Actinobacteria	Corynebacteriales	Nocardiaceae	Rhodococcus	Rhodococcus_sp.
ASV_521	Proteobacteria	Alphaproteobacteria	Micavibrionales	unknown	unknown	unknown
ASV_51	Proteobacteria	Gammaproteobacteria	Burkholderiales	TRA3-20	TRA3-20	unknown
ASV_496	Proteobacteria	Gammaproteobacteria	PLTA13	PLTA13	PLTA13	unknown
ASV_458	Planctomycetota	Planctomycetes	Gemmatales	Gemmataceae	Gemmata	bacterium_enrichment
ASV_45	Planctomycetota	Planctomycetes	Pirellulales	Pirellulaceae	unknown	unknown
ASV_444	Bacteroidota	Bacteroidia	Sphingobacteriales	AKYH767	AKYH767	unknown
ASV_425	Actinobacteriota	Thermoleophilia	Gaiellales	unknown	unknown	unknown
ASV_42	Proteobacteria	Gammaproteobacteria	Burkholderiales	Comamonadaceae	Variovorax	Variovorax_sp.
ASV_401	Latescibacterota	Latescibacterota	Latescibacterota	Latescibacterota	Latescibacterota	unknown
ASV_388	Dependentiae	Babeliae	Babeliales	Babeliales	Babeliales	unknown
ASV_385	Planctomycetota	Phycisphaerae	Phycisphaerales	Phycisphaeraceae	SM1A02	metagenome
ASV_372	Planctomycetota	Planctomycetes	Pirellulales	Pirellulaceae	Pir4_lineage	unknown
ASV_368	Proteobacteria	Alphaproteobacteria	Rhizobiales	Hyphomicrobiaceae	Hyphomicrobium	bacterium_CB03
ASV_343	Proteobacteria	Gammaproteobacteria	Burkholderiales	Nitrosomonadaceae	Ellin6067	unknown
ASV_323	Acidobacteriota	Acidobacteriae	Acidobacteriae	Acidobacteriae	Paludibaculum	unknown
ASV_299	Acidobacteriota	Vicinamibacteria	Vicinamibacterales	unknown	unknown	unknown
ASV_282	Proteobacteria	Alphaproteobacteria	Rhizobiales	Devosiaceae	Devosia	unknown
ASV_259	Proteobacteria	Alphaproteobacteria	Rhizobiales	Rhizobiaceae	Allorhizobium-Neorhizobium-Pararhizobium-Rhizobium	metagenome
ASV_257	Proteobacteria	Alphaproteobacteria	Rhizobiales	Rhizobiales_Incertae_Sedis	Nordella	unknown
ASV_245	Planctomycetota	Planctomycetes	Gemmatales	Gemmataceae	Gemmata	metagenome
ASV_235	Acidobacteriota	Acidobacteriae	Bryobacterales	Bryobacteraceae	Bryobacter	unknown
ASV_226	Bacteroidota	Bacteroidia	Chitinophagales	Saprospiraceae	unknown	unknown
ASV_225	Bacteroidota	Kryptonia	Kryptoniales	BSV26	BSV26	unknown
ASV_220	Actinobacteriota	Thermoleophilia	Gaiellales	unknown	unknown	unknown
ASV_179	Chloroflexi	Anaerolineae	Anaerolineales	Anaerolineaceae	unknown	unknown
ASV_177	Acidobacteriota	Vicinamibacteria	Vicinamibacterales	Vicinamibacteraceae	Vicinamibacteraceae	unknown
ASV_171	Bacteroidota	Bacteroidia	Sphingobacteriales	NS11-12_marine_group	NS11-12_marine_group	metagenome
ASV_160	Cyanobacteria	Sericytochromatia	Sericytochromatia	Sericytochromatia	Sericytochromatia	unknown
ASV_150	Bacteroidota	Bacteroidia	Chitinophagales	Chitinophagaceae	Terrimonas	metagenome
ASV_130	Proteobacteria	Alphaproteobacteria	Rhodospirillales	unknown	unknown	metagenome
ASV_128	Proteobacteria	Alphaproteobacteria	Rhodospirillales	unknown	unknown	metagenome
ASV_126	Proteobacteria	Alphaproteobacteria	Rhizobiales	Xanthobacteraceae	unknown	unknown
ASV_1173	Bdellovibrionota	Bdellovibrionia	Bdellovibrionales	Bdellovibrionaceae	Bdellovibrio	unknown
ASV_1131	Elusimicrobiota	Elusimicrobia	Lineage_IV	Lineage_IV	Lineage_IV	unknown
ASV_1103	Dependentiae	Babeliae	Babeliales	Babeliales	Babeliales	unknown
ASV_103	Acidobacteriota	Vicinamibacteria	Vicinamibacterales	unknown	unknown	unknown
ASV_102	Acidobacteriota	Acidobacteriae	Bryobacterales	Bryobacteraceae	Bryobacter	metagenome
ASV_1009	Bacteroidota	Bacteroidia	Bacteroidetes_VC2.1_Bac22	Bacteroidetes_VC2.1_Bac22	Bacteroidetes_VC2.1_Bac22	metagenome

## Sheet: Core microbiome data Fig 6
Core microbiome data (Figure 6)
otu	otu_occ	otu_rel	Neutral	Kingdom	Phylum	Class	Order	Family	Genus	Otus
ASV_1	0.888889	0.000310522	Above	Bacteria	Proteobacteria	Alphaproteobacteria	SAR11_clade	Clade_III	Clade_III	uncultured_bacterium
ASV_2	1	0.279973	no	Bacteria	Proteobacteria	Gammaproteobacteria	Beggiatoales	Beggiatoaceae	uncultured	uncultured_gamma
ASV_6	0.541667	0.0165607	Below	Bacteria	Proteobacteria	Gammaproteobacteria	Tenderiales	Tenderiaceae	Candidatus_Tenderia	uncultured_Chromatiales
ASV_9	0.805556	0.0278138	Below	Bacteria	Proteobacteria	Gammaproteobacteria	Beggiatoales	Beggiatoaceae	uncultured	uncultured_gamma
ASV_12	1	0.0525901	no	Bacteria	Proteobacteria	Gammaproteobacteria	Burkholderiales	Methylophilaceae	MM1	uncultured_bacterium
ASV_13	1	0.0250537	no	Bacteria	Proteobacteria	Gammaproteobacteria	Burkholderiales	Comamonadaceae	Curvibacter	uncultured_bacterium
ASV_15	0.75	0.000403238	Above	Bacteria	Proteobacteria	Gammaproteobacteria	Burkholderiales	Burkholderiaceae	Polynucleobacter	uncultured_bacterium
ASV_18	0.777778	0.00650846	Below	Bacteria	Bacteroidota	Bacteroidia	Chitinophagales	Chitinophagaceae	Terrimonas	metagenome
ASV_20	0.708333	0.0155408	Below	Bacteria	Proteobacteria	Alphaproteobacteria	Rhizobiales	Amb-16S-1323	Amb-16S-1323	uncultured_bacterium
ASV_22	1	0.00874319	Above	Bacteria	Proteobacteria	Gammaproteobacteria	Burkholderiales	Comamonadaceae	Hydrogenophaga	uncultured_bacterium
ASV_23	0.986111	0.00146946	Above	Bacteria	Proteobacteria	Alphaproteobacteria	Rhizobiales	Rhizobiales_Incertae_Sedis	uncultured	uncultured_bacterium
ASV_33	0.930556	0.00510302	Below	Bacteria	Proteobacteria	Gammaproteobacteria	Burkholderiales	Comamonadaceae	Methylibium	uncultured_bacterium
ASV_34	1	0.00702134	Above	Bacteria	Bacteroidota	Bacteroidia	Chitinophagales	Chitinophagaceae	Terrimonas	uncultured_bacterium
ASV_35	0.902778	0.01117	Below	Bacteria	Proteobacteria	Alphaproteobacteria	Rhizobiales	A0839	A0839	uncultured_bacterium
ASV_44	0.986111	0.00698528	no	Bacteria	Proteobacteria	Gammaproteobacteria	Burkholderiales	TRA3-20	TRA3-20	uncultured_bacterium
ASV_47	0.958333	0.00697645	no	Bacteria	Patescibacteria	Gracilibacteria	JGI_0000069-P22	JGI_0000069-P22	JGI_0000069-P22	uncultured_bacterium
ASV_49	0.888889	0.00745843	Below	Bacteria	Proteobacteria	Gammaproteobacteria	Burkholderiales	Comamonadaceae	Rhizobacter	uncultured_bacterium
ASV_51	0.833333	0.00197425	Below	Bacteria	Proteobacteria	Gammaproteobacteria	Burkholderiales	TRA3-20	TRA3-20	uncultured_bacterium
ASV_55	0.930556	0.00165636	no	Bacteria	Proteobacteria	Alphaproteobacteria	Reyranellales	Reyranellaceae	Reyranella	metagenome
ASV_58	1	0.00618764	Above	Bacteria	Proteobacteria	Alphaproteobacteria	Caulobacterales	Hyphomonadaceae	SWB02	uncultured_bacterium
ASV_64	0.972222	0.00984253	no	Bacteria	Proteobacteria	Alphaproteobacteria	Rhizobiales	Xanthobacteraceae	Xanthobacteraceae	uncultured_bacterium
ASV_68	0.569444	0.000746137	no	Bacteria	Bacteroidota	Kryptonia	Kryptoniales	BSV26	BSV26	uncultured_bacterium
ASV_69	1	0.005039	Above	Bacteria	Acidobacteriota	Vicinamibacteria	Vicinamibacterales	uncultured	uncultured	uncultured_bacterium
ASV_76	0.722222	0.000591611	Above	Bacteria	Bacteroidota	Bacteroidia	Chitinophagales	uncultured	uncultured	uncultured_bacterium
ASV_82	0.833333	0.00546063	Below	Bacteria	Proteobacteria	Alphaproteobacteria	Rhodospirillales	uncultured	uncultured	metagenome
ASV_84	0.694444	0.000779249	no	Bacteria	Proteobacteria	Alphaproteobacteria	Rhizobiales	Hyphomicrobiaceae	Hyphomicrobium	uncultured_bacterium
ASV_87	0.569444	0.000673289	no	Bacteria	Proteobacteria	Alphaproteobacteria	Caulobacterales	Caulobacteraceae	Phenylobacterium	uncultured_bacterium
ASV_91	0.972222	0.000884474	Above	Bacteria	Proteobacteria	Gammaproteobacteria	Burkholderiales	Burkholderiaceae	Ralstonia	uncultured_bacterium
ASV_97	0.986111	0.00379985	no	Bacteria	Acidobacteriota	Acidobacteriae	Acidobacteriae	Acidobacteriae	Paludibaculum	metagenome
ASV_100	0.958333	0.00219352	no	Bacteria	Proteobacteria	Alphaproteobacteria	Rhizobiales	Xanthobacteraceae	Bradyrhizobium	Bradyrhizobium_sp.
ASV_101	1	0.00382561	Above	Bacteria	Proteobacteria	Alphaproteobacteria	Rhizobiales	Rhizobiales_Incertae_Sedis	uncultured	uncultured_bacterium
ASV_103	0.666667	0.00278808	Below	Bacteria	Acidobacteriota	Vicinamibacteria	Vicinamibacterales	uncultured	uncultured	uncultured_bacterium
ASV_118	0.833333	0.0024702	Below	Bacteria	Proteobacteria	Alphaproteobacteria	Rhizobiales	Rhizobiaceae	Allorhizobium-Neorhizobium-Pararhizobium-Rhizobium	Rhizobium_sp.
ASV_120	0.708333	0.00117366	Below	Bacteria	Proteobacteria	Alphaproteobacteria	Rhizobiales	Rhizobiales_Incertae_Sedis	uncultured	uncultured_bacterium
ASV_121	1	0.00360854	Above	Bacteria	Bacteroidota	Bacteroidia	Chitinophagales	Saprospiraceae	uncultured	uncultured_bacterium
ASV_127	0.986111	0.00305666	no	Bacteria	Proteobacteria	Gammaproteobacteria	Burkholderiales	TRA3-20	TRA3-20	uncultured_bacterium
ASV_132	0.861111	0.000699779	Above	Bacteria	Chloroflexi	Anaerolineae	RBG-13-54-9	RBG-13-54-9	RBG-13-54-9	uncultured_bacterium
ASV_137	0.847222	0.00376012	Below	Bacteria	Proteobacteria	Alphaproteobacteria	Rhizobiales	Xanthobacteraceae	uncultured	metagenome
ASV_140	0.75	0.0023326	Below	Bacteria	Acidobacteriota	Vicinamibacteria	Vicinamibacterales	uncultured	uncultured	uncultured_Acidobacteria
ASV_142	0.805556	0.00237969	Below	Bacteria	Proteobacteria	Gammaproteobacteria	Burkholderiales	Nitrosomonadaceae	MND1	uncultured_bacterium
ASV_144	0.972222	0.00247829	no	Bacteria	Proteobacteria	Alphaproteobacteria	Rhodospirillales	uncultured	uncultured	uncultured_bacterium
ASV_150	0.541667	0.00111111	Below	Bacteria	Bacteroidota	Bacteroidia	Chitinophagales	Chitinophagaceae	Terrimonas	metagenome
ASV_154	0.638889	0.000292862	Above	Bacteria	Spirochaetota	Leptospirae	Leptospirales	Leptospiraceae	Turneriella	metagenome
ASV_155	0.875	0.0010493	Above	Bacteria	Bacteroidota	Bacteroidia	Chitinophagales	Chitinophagaceae	Edaphobaculum	uncultured_bacterium
ASV_164	0.736111	0.00179617	Below	Bacteria	Proteobacteria	Alphaproteobacteria	Rhizobiales	Xanthobacteraceae	uncultured	metagenome
ASV_168	0.777778	0.00198013	Below	Bacteria	RCP2-54	RCP2-54	RCP2-54	RCP2-54	RCP2-54	metagenome
ASV_169	0.722222	0.00282193	Below	Bacteria	Chloroflexi	Anaerolineae	Anaerolineales	Anaerolineaceae	UTCFX1	uncultured_Chloroflexi
ASV_171	0.777778	0.000718175	Above	Bacteria	Bacteroidota	Bacteroidia	Sphingobacteriales	NS11-12_marine_group	NS11-12_marine_group	metagenome
ASV_177	0.847222	0.00178955	Below	Bacteria	Acidobacteriota	Vicinamibacteria	Vicinamibacterales	Vicinamibacteraceae	Vicinamibacteraceae	uncultured_Acidobacteria
ASV_179	0.541667	0.00154305	Below	Bacteria	Chloroflexi	Anaerolineae	Anaerolineales	Anaerolineaceae	uncultured	uncultured_bacterium
ASV_181	0.513889	0.00158425	Below	Bacteria	Acidobacteriota	Vicinamibacteria	Vicinamibacterales	Vicinamibacteraceae	Vicinamibacteraceae	uncultured_bacterium
ASV_182	0.833333	0.00182708	Below	Bacteria	Proteobacteria	Alphaproteobacteria	Dongiales	Dongiaceae	Dongia	uncultured_bacterium
ASV_186	1	0.0020206	Above	Bacteria	Proteobacteria	Alphaproteobacteria	Rhizobiales	Xanthobacteraceae	Afipia	Afipia_broomeae
ASV_187	0.972222	0.00239956	no	Bacteria	Proteobacteria	Alphaproteobacteria	Rhizobiales	KF-JG30-B3	KF-JG30-B3	uncultured_Alphaproteobacteria
ASV_193	0.777778	0.00246946	Below	Bacteria	Proteobacteria	Gammaproteobacteria	Burkholderiales	Nitrosomonadaceae	MND1	uncultured_beta
ASV_197	0.694444	0.00177704	Below	Bacteria	Proteobacteria	Alphaproteobacteria	Caulobacterales	Hyphomonadaceae	SWB02	metagenome
ASV_201	0.708333	0.00184474	Below	Bacteria	Proteobacteria	Gammaproteobacteria	Burkholderiales	Nitrosomonadaceae	mle1-7	uncultured_bacterium
ASV_210	0.597222	0.0021663	Below	Bacteria	Proteobacteria	Gammaproteobacteria	Burkholderiales	Nitrosomonadaceae	IS-44	uncultured_bacterium
ASV_219	0.736111	0.00272921	Below	Bacteria	Proteobacteria	Alphaproteobacteria	Rhizobiales	Hyphomicrobiaceae	Pedomicrobium	uncultured_bacterium
ASV_223	0.583333	0.00081457	no	Bacteria	Patescibacteria	Parcubacteria	Parcubacteria	Parcubacteria	Parcubacteria	uncultured_bacterium
ASV_224	0.625	0.00208094	Below	Bacteria	Acidobacteriota	Acidobacteriae	Bryobacterales	Bryobacteraceae	Bryobacter	uncultured_Acidobacteria
ASV_225	0.819444	0.00125828	no	Bacteria	Bacteroidota	Kryptonia	Kryptoniales	BSV26	BSV26	uncultured_soil
ASV_228	0.888889	0.00204341	no	Bacteria	Bacteroidota	Bacteroidia	Cytophagales	Microscillaceae	uncultured	uncultured_bacterium
ASV_237	0.875	0.00178366	no	Bacteria	Verrucomicrobiota	Verrucomicrobiae	Pedosphaerales	Pedosphaeraceae	Pedosphaeraceae	uncultured_bacterium
ASV_242	0.722222	0.00119426	Below	Bacteria	Proteobacteria	Alphaproteobacteria	Rhizobiales	Hyphomicrobiaceae	Pedomicrobium	Pedomicrobium_australicum
ASV_245	0.777778	0.00248933	Below	Bacteria	Planctomycetota	Planctomycetes	Gemmatales	Gemmataceae	Gemmata	metagenome
ASV_247	0.666667	0.00169757	Below	Bacteria	Acidobacteriota	Vicinamibacteria	Vicinamibacterales	uncultured	uncultured	uncultured_bacterium
ASV_254	0.916667	0.00174246	no	Bacteria	Proteobacteria	Alphaproteobacteria	Rhizobiales	Hyphomicrobiaceae	Hyphomicrobium	uncultured_bacterium
ASV_255	0.597222	0.00145033	Below	Bacteria	Acidobacteriota	Acidobacteriae	Acidobacteriae	Acidobacteriae	Acidobacteriae	uncultured_bacterium
ASV_257	0.902778	0.00128403	no	Bacteria	Proteobacteria	Alphaproteobacteria	Rhizobiales	Rhizobiales_Incertae_Sedis	Nordella	uncultured_bacterium
ASV_259	0.805556	0.00128403	no	Bacteria	Proteobacteria	Alphaproteobacteria	Rhizobiales	Rhizobiaceae	Allorhizobium-Neorhizobium-Pararhizobium-Rhizobium	metagenome
ASV_261	0.638889	0.000885946	no	Bacteria	Bacteroidota	Bacteroidia	Chitinophagales	Chitinophagaceae	Ferruginibacter	uncultured_bacterium
ASV_264	0.777778	0.00120235	no	Bacteria	Proteobacteria	Gammaproteobacteria	Burkholderiales	B1-7BS	B1-7BS	uncultured_bacterium
ASV_270	0.888889	0.00127667	no	Bacteria	Proteobacteria	Alphaproteobacteria	Rhizobiales	KF-JG30-B3	KF-JG30-B3	metagenome
ASV_278	0.694444	0.00103753	no	Bacteria	Planctomycetota	Planctomycetes	Pirellulales	Pirellulaceae	uncultured	uncultured_bacterium
ASV_284	0.666667	0.0013245	Below	Bacteria	Proteobacteria	Gammaproteobacteria	Burkholderiales	Nitrosomonadaceae	MND1	metagenome
ASV_290	0.861111	0.00170052	no	Bacteria	Acidobacteriota	Vicinamibacteria	Vicinamibacterales	Vicinamibacteraceae	Vicinamibacteraceae	uncultured_bacterium
ASV_297	0.625	0.0024415	Below	Bacteria	Acidobacteriota	Subgroup_5	Subgroup_5	Subgroup_5	Subgroup_5	uncultured_Acidobacteria
ASV_298	0.944444	0.00087638	Above	Bacteria	Verrucomicrobiota	Verrucomicrobiae	Pedosphaerales	Pedosphaeraceae	uncultured	uncultured_bacterium
ASV_300	0.777778	0.000941869	no	Bacteria	Proteobacteria	Alphaproteobacteria	Rhizobiales	Xanthobacteraceae	Pseudorhodoplanes	uncultured_bacterium
ASV_301	0.902778	0.00136939	no	Bacteria	Planctomycetota	Phycisphaerae	Tepidisphaerales	WD2101_soil_group	WD2101_soil_group	uncultured_bacterium
ASV_314	0.611111	0.00127373	Below	Bacteria	Proteobacteria	Gammaproteobacteria	Burkholderiales	Nitrosomonadaceae	IS-44	uncultured_bacterium
ASV_316	0.736111	0.00114643	no	Bacteria	Desulfobacterota	uncultured	uncultured	uncultured	uncultured	uncultured_bacterium
ASV_320	0.597222	0.0017167	Below	Bacteria	Acidobacteriota	Vicinamibacteria	Vicinamibacterales	Vicinamibacteraceae	Vicinamibacteraceae	uncultured_Acidobacteria
ASV_328	0.736111	0.00127226	Below	Bacteria	Acidobacteriota	Vicinamibacteria	Vicinamibacterales	Vicinamibacteraceae	Vicinamibacteraceae	uncultured_Acidobacteria
ASV_329	0.777778	0.000866814	no	Bacteria	Proteobacteria	Gammaproteobacteria	Burkholderiales	Nitrosomonadaceae	MND1	uncultured_beta
ASV_342	0.652778	0.000974246	no	Bacteria	Acidobacteriota	Vicinamibacteria	Vicinamibacterales	Vicinamibacteraceae	Vicinamibacteraceae	uncultured_Acidobacteria
ASV_345	0.680556	0.00105592	no	Bacteria	Proteobacteria	Gammaproteobacteria	Burkholderiales	Nitrosomonadaceae	MND1	uncultured_bacterium
ASV_346	0.611111	0.000930831	Below	Bacteria	Proteobacteria	Alphaproteobacteria	Rhizobiales	Xanthobacteraceae	Rhodoplanes	metagenome
ASV_352	0.833333	0.00100368	no	Bacteria	Proteobacteria	Alphaproteobacteria	Caulobacterales	Hyphomonadaceae	SWB02	uncultured_bacterium
ASV_354	0.833333	0.000665931	Above	Bacteria	Nitrospirota	Nitrospiria	Nitrospirales	Nitrospiraceae	Nitrospira	uncultured_bacterium
ASV_356	0.736111	0.000699043	Above	Bacteria	Bacteroidota	Bacteroidia	Cytophagales	Microscillaceae	uncultured	uncultured_bacterium
ASV_357	0.791667	0.00138116	no	Bacteria	Acidobacteriota	Acidobacteriae	Bryobacterales	Bryobacteraceae	Bryobacter	uncultured_bacterium
ASV_358	0.791667	0.00116924	no	Bacteria	Proteobacteria	Gammaproteobacteria	Burkholderiales	TRA3-20	TRA3-20	metagenome
ASV_363	0.638889	0.000810155	no	Bacteria	Acidobacteriota	Subgroup_5	Subgroup_5	Subgroup_5	Subgroup_5	uncultured_bacterium
ASV_366	0.805556	0.000779985	Above	Bacteria	Desulfobacterota	Desulfuromonadia	PB19	PB19	PB19	uncultured_bacterium
ASV_370	0.597222	0.000921266	Below	Bacteria	Verrucomicrobiota	Verrucomicrobiae	Pedosphaerales	Pedosphaeraceae	Pedosphaeraceae	uncultured_bacterium
ASV_372	0.805556	0.000703458	Above	Bacteria	Planctomycetota	Planctomycetes	Pirellulales	Pirellulaceae	Pir4_lineage	uncultured_bacterium
ASV_375	0.597222	0.000820456	no	Bacteria	Acidobacteriota	Acidobacteriae	Subgroup_2	Subgroup_2	Subgroup_2	uncultured_bacterium
ASV_384	0.958333	0.000863135	Above	Bacteria	Proteobacteria	Gammaproteobacteria	Burkholderiales	Methylophilaceae	uncultured	metagenome
ASV_385	0.736111	0.000809419	no	Bacteria	Planctomycetota	Phycisphaerae	Phycisphaerales	Phycisphaeraceae	SM1A02	metagenome
ASV_388	0.666667	0.000379691	Above	Bacteria	Dependentiae	Babeliae	Babeliales	Babeliales	Babeliales	uncultured_bacterium
ASV_389	0.722222	0.00104268	no	Bacteria	Proteobacteria	Gammaproteobacteria	Burkholderiales	TRA3-20	TRA3-20	uncultured_bacterium
ASV_399	0.666667	0.000702723	no	Bacteria	Armatimonadota	Fimbriimonadia	Fimbriimonadales	Fimbriimonadaceae	Fimbriimonadaceae	uncultured_bacterium
ASV_401	0.791667	0.000522443	Above	Bacteria	Latescibacterota	Latescibacterota	Latescibacterota	Latescibacterota	Latescibacterota	uncultured_Latescibacteria
ASV_405	0.666667	0.00095585	no	Bacteria	Proteobacteria	Alphaproteobacteria	Rhizobiales	KF-JG30-B3	KF-JG30-B3	uncultured_bacterium
ASV_406	0.652778	0.00152612	Below	Bacteria	Proteobacteria	Gammaproteobacteria	Burkholderiales	Nitrosomonadaceae	MND1	metagenome
ASV_425	0.833333	0.000713024	Above	Bacteria	Actinobacteriota	Thermoleophilia	Gaiellales	uncultured	uncultured	uncultured_bacterium
ASV_429	0.694444	0.000820456	no	Bacteria	Proteobacteria	Alphaproteobacteria	Rhizobiales	A0839	A0839	uncultured_bacterium
ASV_442	0.708333	0.000747609	no	Bacteria	Proteobacteria	Alphaproteobacteria	Dongiales	Dongiaceae	Dongia	uncultured_bacterium
ASV_445	0.708333	0.000593083	Above	Bacteria	Chloroflexi	Anaerolineae	Anaerolineales	Anaerolineaceae	uncultured	uncultured_bacterium
ASV_452	0.722222	0.000866078	no	Bacteria	Acidobacteriota	Acidobacteriae	Bryobacterales	Bryobacteraceae	Bryobacter	metagenome
ASV_458	0.652778	0.000628403	no	Bacteria	Planctomycetota	Planctomycetes	Gemmatales	Gemmataceae	Gemmata	bacterium_enrichment
ASV_466	0.680556	0.000579838	Above	Bacteria	Proteobacteria	Alphaproteobacteria	Dongiales	Dongiaceae	Dongia	Azospirillum_sp.
ASV_476	0.555556	0.000995585	Below	Bacteria	Proteobacteria	Alphaproteobacteria	Rhodospirillales	uncultured	uncultured	uncultured_bacterium
ASV_477	0.569444	0.000690949	no	Bacteria	Bacteroidota	Bacteroidia	Chitinophagales	Saprospiraceae	uncultured	uncultured_bacterium
ASV_479	0.875	0.00104562	Above	Bacteria	Proteobacteria	Gammaproteobacteria	JTB23	JTB23	JTB23	metagenome
ASV_499	0.902778	0.000818985	Above	Bacteria	Bacteroidota	Bacteroidia	Chitinophagales	Saprospiraceae	uncultured	uncultured_Saprospiraceae
ASV_502	0.680556	0.000743194	no	Bacteria	Proteobacteria	Gammaproteobacteria	Burkholderiales	Comamonadaceae	uncultured	metagenome
ASV_516	0.861111	0.000580574	Above	Bacteria	Armatimonadota	uncultured	uncultured	uncultured	uncultured	uncultured_actinobacterium
ASV_518	0.680556	0.000619573	no	Bacteria	Bacteroidota	Bacteroidia	Chitinophagales	Chitinophagaceae	Terrimonas	uncultured_bacterium
ASV_521	0.611111	0.000353937	Above	Bacteria	Proteobacteria	Alphaproteobacteria	Micavibrionales	uncultured	uncultured	uncultured_bacterium
ASV_524	0.611111	0.000438558	Above	Bacteria	Bacteroidota	Bacteroidia	Chitinophagales	Chitinophagaceae	uncultured	uncultured_bacterium
ASV_531	0.819444	0.000685798	Above	Bacteria	Hydrogenedentes	Hydrogenedentia	Hydrogenedentiales	Hydrogenedensaceae	Hydrogenedensaceae	metagenome
ASV_538	0.638889	0.000571008	no	Bacteria	Proteobacteria	Alphaproteobacteria	Rhizobiales	Xanthobacteraceae	Rhodoplanes	metagenome
ASV_542	0.75	0.000621045	Above	Bacteria	Planctomycetota	Planctomycetes	Planctomycetales	uncultured	uncultured	uncultured_bacterium
ASV_552	0.847222	0.000724062	Above	Bacteria	Verrucomicrobiota	Verrucomicrobiae	Pedosphaerales	Pedosphaeraceae	Pedosphaeraceae	uncultured_bacterium
ASV_564	0.763889	0.000466519	Above	Bacteria	Bacteroidota	Bacteroidia	Chitinophagales	Chitinophagaceae	uncultured	uncultured_Bacteroidetes
ASV_574	0.791667	0.000620309	Above	Bacteria	Planctomycetota	Phycisphaerae	Phycisphaerales	Phycisphaeraceae	SM1A02	uncultured_planctomycete
ASV_578	0.930556	0.00084621	Above	Bacteria	Acidobacteriota	Subgroup_5	Subgroup_5	Subgroup_5	Subgroup_5	uncultured_bacterium
ASV_588	0.694444	0.000387785	Above	Bacteria	Verrucomicrobiota	Verrucomicrobiae	Opitutales	Opitutaceae	Lacunisphaera	metagenome
ASV_592	0.638889	0.000607064	no	Bacteria	Acidobacteriota	Blastocatellia	Blastocatellales	Blastocatellaceae	Stenotrophobacter	uncultured_Acidobacteria
ASV_600	0.722222	0.00068727	no	Bacteria	Planctomycetota	Planctomycetes	Planctomycetales	uncultured	uncultured	uncultured_bacterium
ASV_616	0.597222	0.000691685	no	Bacteria	Acidobacteriota	Vicinamibacteria	Vicinamibacterales	uncultured	uncultured	uncultured_Acidobacteria
ASV_623	0.833333	0.000409124	Above	Bacteria	Bacteroidota	Bacteroidia	Chitinophagales	Saprospiraceae	uncultured	uncultured_Saprospiraceae
ASV_630	0.819444	0.000401766	Above	Bacteria	Bacteroidota	Bacteroidia	Chitinophagales	Chitinophagaceae	Lacibacter	uncultured_bacterium
ASV_632	0.777778	0.000859455	no	Bacteria	Bdellovibrionota	Bdellovibrionia	Bdellovibrionales	Bdellovibrionaceae	OM27_clade	uncultured_bacterium
ASV_636	0.708333	0.000772627	no	Bacteria	Armatimonadota	Fimbriimonadia	Fimbriimonadales	Fimbriimonadales	Fimbriimonadales	uncultured_bacterium
ASV_638	0.666667	0.000585725	no	Bacteria	Proteobacteria	Gammaproteobacteria	Gammaproteobacteria_Incertae_Sedis	Unknown_Family	Candidatus_Berkiella	uncultured_bacterium
ASV_642	0.625	0.000366446	Above	Bacteria	Planctomycetota	Planctomycetes	Planctomycetales	uncultured	uncultured	metagenome
ASV_646	0.694444	0.000522443	Above	Bacteria	Planctomycetota	Planctomycetes	Planctomycetales	uncultured	uncultured	uncultured_bacterium
ASV_650	0.597222	0.000583517	no	Bacteria	Latescibacterota	Latescibacterota	Latescibacterota	Latescibacterota	Latescibacterota	uncultured_Latescibacteria
ASV_659	0.916667	0.000640912	Above	Bacteria	Proteobacteria	Alphaproteobacteria	Thalassobaculales	uncultured	uncultured	metagenome
ASV_663	0.833333	0.000690213	Above	Bacteria	Planctomycetota	Planctomycetes	Pirellulales	Pirellulaceae	uncultured	uncultured_bacterium
ASV_665	0.638889	0.000311258	Above	Bacteria	Planctomycetota	Planctomycetes	Planctomycetales	uncultured	uncultured	uncultured_bacterium
ASV_674	0.763889	0.000588668	Above	Bacteria	Bacteroidota	Bacteroidia	Sphingobacteriales	AKYH767	AKYH767	uncultured_bacterium
ASV_693	0.722222	0.000494481	Above	Bacteria	Hydrogenedentes	Hydrogenedentia	Hydrogenedentiales	Hydrogenedensaceae	Hydrogenedensaceae	metagenome
ASV_714	0.513889	0.000333333	Above	Bacteria	Planctomycetota	Phycisphaerae	Phycisphaerales	Phycisphaeraceae	SM1A02	metagenome
ASV_796	0.666667	0.000297277	Above	Bacteria	Proteobacteria	Gammaproteobacteria	Gammaproteobacteria_Incertae_Sedis	Unknown_Family	uncultured	uncultured_bacterium
ASV_798	0.638889	0.00040986	Above	Bacteria	Acidobacteriota	Acidobacteriae	Solibacterales	Solibacteraceae	Candidatus_Solibacter	metagenome
ASV_825	0.638889	0.000546726	no	Bacteria	Proteobacteria	Alphaproteobacteria	Micropepsales	Micropepsaceae	uncultured	metagenome
ASV_828	0.666667	0.000355408	Above	Bacteria	Planctomycetota	Phycisphaerae	Phycisphaerales	Phycisphaeraceae	SM1A02	uncultured_bacterium
ASV_844	0.722222	0.000327447	Above	Bacteria	Sumerlaeota	Sumerlaeia	Sumerlaeales	Sumerlaeaceae	Sumerlaea	uncultured_bacterium
ASV_863	0.708333	0.000611479	Above	Bacteria	Bdellovibrionota	Bdellovibrionia	Bdellovibrionales	Bdellovibrionaceae	OM27_clade	uncultured_bacterium
ASV_895	0.736111	0.000420162	Above	Bacteria	Acidobacteriota	Vicinamibacteria	Vicinamibacterales	uncultured	uncultured	uncultured_bacterium
ASV_937	0.680556	0.000302428	Above	Bacteria	Bacteroidota	Bacteroidia	Chitinophagales	37-13	37-13	uncultured_bacterium
ASV_940	0.75	0.000518028	Above	Bacteria	Elusimicrobiota	Lineage_IIb	Lineage_IIb	Lineage_IIb	Lineage_IIb	uncultured_soil
ASV_1004	0.652778	0.00037454	Above	Bacteria	Acidobacteriota	Blastocatellia	45597	45597	45597	uncultured_bacterium
ASV_1149	0.652778	0.000378219	Above	Bacteria	Planctomycetota	Planctomycetes	Planctomycetales	uncultured	uncultured	uncultured_bacterium
ASV_1194	0.583333	0.000314937	Above	Bacteria	Verrucomicrobiota	Kiritimatiellae	WCHB1-41	WCHB1-41	WCHB1-41	metagenome

## Sheet: Core microbiome data filter bed
Core microbiome filter bed day 34 (supplementary figure x)
otu	otu_occ	otu_rel	Neutral	Kingdom	Phylum	Class	Order	Family	Genus	Otus
ASV_1	1	0.00866416	Above	Bacteria	Proteobacteria	Alphaproteobacteria	SAR11_clade	Clade_III	Clade_III	uncultured_bacterium
ASV_2	0.962963	0.0912465	no	Bacteria	Proteobacteria	Gammaproteobacteria	Beggiatoales	Beggiatoaceae	uncultured	uncultured_gamma
ASV_4	0.666667	0.00381142	Below	Bacteria	Proteobacteria	Gammaproteobacteria	Burkholderiales	Comamonadaceae	Rhodoferax	uncultured_bacterium
ASV_5	0.481481	0.00355889	Below	Bacteria	Proteobacteria	Gammaproteobacteria	Burkholderiales	Comamonadaceae	Aquabacterium	uncultured_bacterium
ASV_6	1	0.0601643	no	Bacteria	Proteobacteria	Gammaproteobacteria	Tenderiales	Tenderiaceae	Candidatus_Tenderia	uncultured_Chromatiales
ASV_7	0.518519	0.132623	Below	Bacteria	Proteobacteria	Gammaproteobacteria	Beggiatoales	Beggiatoaceae	uncultured	uncultured_bacterium
ASV_8	0.851852	0.00508345	Below	Bacteria	Proteobacteria	Gammaproteobacteria	Burkholderiales	Methylophilaceae	Candidatus_Methylopumilus	uncultured_bacterium
ASV_9	0.592593	0.0209854	Below	Bacteria	Proteobacteria	Gammaproteobacteria	Beggiatoales	Beggiatoaceae	uncultured	uncultured_gamma
ASV_10	0.444444	0.00884967	Below	Bacteria	Actinobacteriota	Actinobacteria	Frankiales	Sporichthyaceae	hgcI_clade	uncultured_bacterium
ASV_12	1	0.0677809	no	Bacteria	Proteobacteria	Gammaproteobacteria	Burkholderiales	Methylophilaceae	MM1	uncultured_bacterium
ASV_13	1	0.0317774	no	Bacteria	Proteobacteria	Gammaproteobacteria	Burkholderiales	Comamonadaceae	Curvibacter	uncultured_bacterium
ASV_14	0.444444	0.0124958	Below	Bacteria	Proteobacteria	Gammaproteobacteria	Burkholderiales	Comamonadaceae	Aquabacterium	Aquabacterium_olei
ASV_15	0.962963	0.00164304	no	Bacteria	Proteobacteria	Gammaproteobacteria	Burkholderiales	Burkholderiaceae	Polynucleobacter	uncultured_bacterium
ASV_20	0.62963	0.0139004	Below	Bacteria	Proteobacteria	Alphaproteobacteria	Rhizobiales	Amb-16S-1323	Amb-16S-1323	uncultured_bacterium
ASV_22	1	0.0250556	no	Bacteria	Proteobacteria	Gammaproteobacteria	Burkholderiales	Comamonadaceae	Hydrogenophaga	uncultured_bacterium
ASV_23	1	0.010817	no	Bacteria	Proteobacteria	Alphaproteobacteria	Rhizobiales	Rhizobiales_Incertae_Sedis	uncultured	uncultured_bacterium
ASV_29	0.518519	0.00327517	Below	Bacteria	Proteobacteria	Gammaproteobacteria	Burkholderiales	Comamonadaceae	Acidovorax	uncultured_bacterium
ASV_33	0.888889	0.00945451	no	Bacteria	Proteobacteria	Gammaproteobacteria	Burkholderiales	Comamonadaceae	Methylibium	uncultured_bacterium
ASV_34	0.666667	0.00100547	no	Bacteria	Bacteroidota	Bacteroidia	Chitinophagales	Chitinophagaceae	Terrimonas	uncultured_bacterium
ASV_35	0.444444	0.000424011	no	Bacteria	Proteobacteria	Alphaproteobacteria	Rhizobiales	A0839	A0839	uncultured_bacterium
ASV_42	0.962963	0.00736719	no	Bacteria	Proteobacteria	Gammaproteobacteria	Burkholderiales	Comamonadaceae	Variovorax	Variovorax_sp.
ASV_43	0.592593	0.00141077	Below	Bacteria	Proteobacteria	Alphaproteobacteria	Reyranellales	Reyranellaceae	Reyranella	uncultured_bacterium
ASV_44	0.962963	0.0127063	no	Bacteria	Proteobacteria	Gammaproteobacteria	Burkholderiales	TRA3-20	TRA3-20	uncultured_bacterium
ASV_45	0.888889	0.0112846	no	Bacteria	Planctomycetota	Planctomycetes	Pirellulales	Pirellulaceae	uncultured	uncultured_bacterium
ASV_47	0.777778	0.000972731	no	Bacteria	Patescibacteria	Gracilibacteria	JGI_0000069-P22	JGI_0000069-P22	JGI_0000069-P22	uncultured_bacterium
ASV_49	0.555556	0.00623078	Below	Bacteria	Proteobacteria	Gammaproteobacteria	Burkholderiales	Comamonadaceae	Rhizobacter	uncultured_bacterium
ASV_51	0.62963	0.000668752	no	Bacteria	Proteobacteria	Gammaproteobacteria	Burkholderiales	TRA3-20	TRA3-20	uncultured_bacterium
ASV_55	0.925926	0.00234297	no	Bacteria	Proteobacteria	Alphaproteobacteria	Reyranellales	Reyranellaceae	Reyranella	metagenome
ASV_58	0.888889	0.00544823	no	Bacteria	Proteobacteria	Alphaproteobacteria	Caulobacterales	Hyphomonadaceae	SWB02	uncultured_bacterium
ASV_59	0.777778	0.0231881	Below	Bacteria	Proteobacteria	Gammaproteobacteria	Burkholderiales	Comamonadaceae	Ramlibacter	uncultured_bacterium
ASV_62	0.37037	0.00271554	Below	Bacteria	Actinobacteriota	Actinobacteria	Frankiales	Sporichthyaceae	hgcI_clade	uncultured_actinobacterium
ASV_64	0.814815	0.0202715	Below	Bacteria	Proteobacteria	Alphaproteobacteria	Rhizobiales	Xanthobacteraceae	Xanthobacteraceae	uncultured_bacterium
ASV_69	0.814815	0.00120656	no	Bacteria	Acidobacteriota	Vicinamibacteria	Vicinamibacterales	uncultured	uncultured	uncultured_bacterium
ASV_72	1	0.00709751	Above	Bacteria	Proteobacteria	Alphaproteobacteria	Rhizobiales	Xanthobacteraceae	Afipia	uncultured_bacterium
ASV_73	0.333333	0.00252692	Below	Bacteria	Proteobacteria	Gammaproteobacteria	Burkholderiales	Comamonadaceae	Limnohabitans	uncultured_bacterium
ASV_76	0.851852	0.000715518	Above	Bacteria	Bacteroidota	Bacteroidia	Chitinophagales	uncultured	uncultured	uncultured_bacterium
ASV_84	0.740741	0.00105535	no	Bacteria	Proteobacteria	Alphaproteobacteria	Rhizobiales	Hyphomicrobiaceae	Hyphomicrobium	uncultured_bacterium
ASV_89	0.481481	0.000790344	Below	Bacteria	Bacteroidota	Bacteroidia	Chitinophagales	Chitinophagaceae	Terrimonas	uncultured_Sphingobacteriales
ASV_91	1	0.00419958	Above	Bacteria	Proteobacteria	Gammaproteobacteria	Burkholderiales	Burkholderiaceae	Ralstonia	uncultured_bacterium
ASV_93	0.518519	0.00193455	Below	Bacteria	Planctomycetota	Planctomycetes	Gemmatales	Gemmataceae	uncultured	uncultured_bacterium
ASV_94	0.333333	0.00045207	no	Bacteria	Spirochaetota	Leptospirae	Leptospirales	Leptospiraceae	Turneriella	uncultured_bacterium
ASV_97	0.814815	0.0028044	Below	Bacteria	Acidobacteriota	Acidobacteriae	Acidobacteriae	Acidobacteriae	Paludibaculum	metagenome
ASV_100	0.962963	0.00190961	no	Bacteria	Proteobacteria	Alphaproteobacteria	Rhizobiales	Xanthobacteraceae	Bradyrhizobium	Bradyrhizobium_sp.
ASV_101	0.777778	0.00125021	no	Bacteria	Proteobacteria	Alphaproteobacteria	Rhizobiales	Rhizobiales_Incertae_Sedis	uncultured	uncultured_bacterium
ASV_102	0.740741	0.00134998	no	Bacteria	Acidobacteriota	Acidobacteriae	Bryobacterales	Bryobacteraceae	Bryobacter	metagenome
ASV_106	0.740741	0.000367892	Above	Bacteria	Acidobacteriota	Acidobacteriae	Solibacterales	Solibacteraceae	Candidatus_Solibacter	uncultured_bacterium
ASV_109	0.666667	0.00436638	Below	Bacteria	Proteobacteria	Gammaproteobacteria	Burkholderiales	Comamonadaceae	Rhizobacter	uncultured_bacterium
ASV_118	1	0.00359006	Above	Bacteria	Proteobacteria	Alphaproteobacteria	Rhizobiales	Rhizobiaceae	Allorhizobium-Neorhizobium-Pararhizobium-Rhizobium	Rhizobium_sp.
ASV_121	0.814815	0.00107094	no	Bacteria	Bacteroidota	Bacteroidia	Chitinophagales	Saprospiraceae	uncultured	uncultured_bacterium
ASV_122	0.481481	0.00900711	Below	Bacteria	Proteobacteria	Gammaproteobacteria	Burkholderiales	Comamonadaceae	Caenimonas	uncultured_bacterium
ASV_124	0.481481	0.00045207	no	Bacteria	Proteobacteria	Alphaproteobacteria	Sphingomonadales	Sphingomonadaceae	Blastomonas	Blastomonas_natatoria
ASV_127	0.777778	0.00235077	Below	Bacteria	Proteobacteria	Gammaproteobacteria	Burkholderiales	TRA3-20	TRA3-20	uncultured_bacterium
ASV_128	0.962963	0.00342171	no	Bacteria	Proteobacteria	Alphaproteobacteria	Rhodospirillales	uncultured	uncultured	metagenome
ASV_130	0.592593	0.000222917	Above	Bacteria	Proteobacteria	Alphaproteobacteria	Rhodospirillales	uncultured	uncultured	metagenome
ASV_132	0.481481	0.00017771	Above	Bacteria	Chloroflexi	Anaerolineae	RBG-13-54-9	RBG-13-54-9	RBG-13-54-9	uncultured_bacterium
ASV_134	0.62963	0.0101981	Below	Bacteria	Proteobacteria	Gammaproteobacteria	Burkholderiales	Oxalobacteraceae	Massilia	uncultured_bacterium
ASV_136	0.666667	0.00042557	Above	Bacteria	Gemmatimonadota	Gemmatimonadetes	Gemmatimonadales	Gemmatimonadaceae	Gemmatimonas	uncultured_bacterium
ASV_137	0.62963	0.00439444	Below	Bacteria	Proteobacteria	Alphaproteobacteria	Rhizobiales	Xanthobacteraceae	uncultured	metagenome
ASV_144	0.666667	0.00151366	Below	Bacteria	Proteobacteria	Alphaproteobacteria	Rhodospirillales	uncultured	uncultured	uncultured_bacterium
ASV_151	0.703704	0.00170696	Below	Bacteria	Proteobacteria	Alphaproteobacteria	Caulobacterales	Hyphomonadaceae	Hirschia	metagenome
ASV_155	1	0.00239909	Above	Bacteria	Bacteroidota	Bacteroidia	Chitinophagales	Chitinophagaceae	Edaphobaculum	uncultured_bacterium
ASV_159	0.444444	0.000143415	Above	Bacteria	Proteobacteria	Gammaproteobacteria	Xanthomonadales	Xanthomonadaceae	Pseudoxanthomonas	uncultured_Xanthomonadaceae
ASV_160	0.666667	0.00216526	Below	Bacteria	Cyanobacteria	Sericytochromatia	Sericytochromatia	Sericytochromatia	Sericytochromatia	uncultured_prokaryote
ASV_161	0.333333	0.00110368	Below	Bacteria	Bacteroidota	Bacteroidia	Cytophagales	Spirosomaceae	Lacihabitans	uncultured_bacterium
ASV_162	0.555556	0.00203899	Below	Bacteria	Bacteroidota	Bacteroidia	Sphingobacteriales	LiUU-11-161	LiUU-11-161	uncultured_bacterium
ASV_165	0.555556	0.000336715	no	Bacteria	Proteobacteria	Alphaproteobacteria	Caulobacterales	Caulobacteraceae	Caulobacter	Caulobacter_fusiformis
ASV_168	0.37037	0.000307096	no	Bacteria	RCP2-54	RCP2-54	RCP2-54	RCP2-54	RCP2-54	metagenome
ASV_171	0.518519	0.000257212	Above	Bacteria	Bacteroidota	Bacteroidia	Sphingobacteriales	NS11-12_marine_group	NS11-12_marine_group	metagenome
ASV_177	0.407407	0.000279037	no	Bacteria	Acidobacteriota	Vicinamibacteria	Vicinamibacterales	Vicinamibacteraceae	Vicinamibacteraceae	uncultured_Acidobacteria
ASV_180	0.481481	0.000444276	no	Bacteria	Planctomycetota	Planctomycetes	Planctomycetales	Schlesneriaceae	Schlesneria	uncultured_bacterium
ASV_182	0.407407	0.000349185	no	Bacteria	Proteobacteria	Alphaproteobacteria	Dongiales	Dongiaceae	Dongia	uncultured_bacterium
ASV_184	0.740741	0.00506475	Below	Bacteria	Proteobacteria	Gammaproteobacteria	Burkholderiales	Methylophilaceae	MM1	uncultured_bacterium
ASV_186	0.962963	0.0038083	no	Bacteria	Proteobacteria	Alphaproteobacteria	Rhizobiales	Xanthobacteraceae	Afipia	Afipia_broomeae
ASV_187	0.62963	0.00155107	Below	Bacteria	Proteobacteria	Alphaproteobacteria	Rhizobiales	KF-JG30-B3	KF-JG30-B3	uncultured_Alphaproteobacteria
ASV_192	0.555556	0.00968522	Below	Bacteria	Proteobacteria	Gammaproteobacteria	Burkholderiales	Hydrogenophilaceae	Thiobacillus	uncultured_bacterium
ASV_201	0.407407	0.00067187	Below	Bacteria	Proteobacteria	Gammaproteobacteria	Burkholderiales	Nitrosomonadaceae	mle1-7	uncultured_bacterium
ASV_202	0.37037	0.00220891	Below	Bacteria	Proteobacteria	Gammaproteobacteria	Burkholderiales	Methylophilaceae	Methylophilus	Methylotenera_sp.
ASV_209	0.62963	0.00412787	Below	Bacteria	Proteobacteria	Alphaproteobacteria	Micavibrionales	uncultured	uncultured	uncultured_bacterium
ASV_212	0.481481	0.000166798	Above	Bacteria	Bacteroidota	Bacteroidia	Sphingobacteriales	NS11-12_marine_group	NS11-12_marine_group	uncultured_Bacteroidetes
ASV_219	0.740741	0.00522063	Below	Bacteria	Proteobacteria	Alphaproteobacteria	Rhizobiales	Hyphomicrobiaceae	Pedomicrobium	uncultured_bacterium
ASV_220	0.925926	0.000915053	Above	Bacteria	Actinobacteriota	Thermoleophilia	Gaiellales	uncultured	uncultured	uncultured_bacterium
ASV_224	0.444444	0.000674988	no	Bacteria	Acidobacteriota	Acidobacteriae	Bryobacterales	Bryobacteraceae	Bryobacter	uncultured_Acidobacteria
ASV_226	0.925926	0.00154327	no	Bacteria	Bacteroidota	Bacteroidia	Chitinophagales	Saprospiraceae	uncultured	uncultured_Devosia
ASV_228	0.592593	0.0014856	Below	Bacteria	Bacteroidota	Bacteroidia	Cytophagales	Microscillaceae	uncultured	uncultured_bacterium
ASV_231	1	0.0019517	Above	Bacteria	Bacteroidota	Bacteroidia	Chitinophagales	Chitinophagaceae	Ferruginibacter	uncultured_bacterium
ASV_233	0.592593	0.000642252	no	Bacteria	Proteobacteria	Gammaproteobacteria	Ga0077536	Ga0077536	Ga0077536	uncultured_bacterium
ASV_236	0.740741	0.0020234	Below	Bacteria	Proteobacteria	Alphaproteobacteria	Caulobacterales	Hyphomonadaceae	Hirschia	uncultured_bacterium
ASV_237	0.518519	0.000766961	no	Bacteria	Verrucomicrobiota	Verrucomicrobiae	Pedosphaerales	Pedosphaeraceae	Pedosphaeraceae	uncultured_bacterium
ASV_242	0.814815	0.00202964	no	Bacteria	Proteobacteria	Alphaproteobacteria	Rhizobiales	Hyphomicrobiaceae	Pedomicrobium	Pedomicrobium_australicum
ASV_245	0.814815	0.00549655	Below	Bacteria	Planctomycetota	Planctomycetes	Gemmatales	Gemmataceae	Gemmata	metagenome
ASV_246	0.444444	0.00134686	Below	Bacteria	Planctomycetota	Planctomycetes	Gemmatales	Gemmataceae	uncultured	uncultured_bacterium
ASV_251	0.703704	0.000763843	no	Bacteria	Proteobacteria	Gammaproteobacteria	Burkholderiales	Nitrosomonadaceae	GOUTA6	metagenome
ASV_254	0.555556	0.00120968	Below	Bacteria	Proteobacteria	Alphaproteobacteria	Rhizobiales	Hyphomicrobiaceae	Hyphomicrobium	uncultured_bacterium
ASV_257	0.481481	0.000221359	Above	Bacteria	Proteobacteria	Alphaproteobacteria	Rhizobiales	Rhizobiales_Incertae_Sedis	Nordella	uncultured_bacterium
ASV_259	0.814815	0.00202808	no	Bacteria	Proteobacteria	Alphaproteobacteria	Rhizobiales	Rhizobiaceae	Allorhizobium-Neorhizobium-Pararhizobium-Rhizobium	metagenome
ASV_264	0.481481	0.0010647	Below	Bacteria	Proteobacteria	Gammaproteobacteria	Burkholderiales	B1-7BS	B1-7BS	uncultured_bacterium
ASV_270	0.740741	0.00133439	no	Bacteria	Proteobacteria	Alphaproteobacteria	Rhizobiales	KF-JG30-B3	KF-JG30-B3	metagenome
ASV_281	0.62963	0.000949348	no	Bacteria	Bacteroidota	Bacteroidia	Sphingobacteriales	AKYH767	AKYH767	uncultured_bacterium
ASV_282	0.962963	0.00144818	Above	Bacteria	Proteobacteria	Alphaproteobacteria	Rhizobiales	Devosiaceae	Devosia	uncultured_bacterium
ASV_298	0.777778	0.000676547	no	Bacteria	Verrucomicrobiota	Verrucomicrobiae	Pedosphaerales	Pedosphaeraceae	uncultured	uncultured_bacterium
ASV_300	0.407407	0.000438041	no	Bacteria	Proteobacteria	Alphaproteobacteria	Rhizobiales	Xanthobacteraceae	Pseudorhodoplanes	uncultured_bacterium
ASV_301	0.444444	0.00027436	no	Bacteria	Planctomycetota	Phycisphaerae	Tepidisphaerales	WD2101_soil_group	WD2101_soil_group	uncultured_bacterium
ASV_307	0.962963	0.0039564	no	Bacteria	Proteobacteria	Alphaproteobacteria	Micavibrionales	uncultured	uncultured	uncultured_sludge
ASV_314	0.37037	0.000530014	no	Bacteria	Proteobacteria	Gammaproteobacteria	Burkholderiales	Nitrosomonadaceae	IS-44	uncultured_bacterium
ASV_320	0.592593	0.00256121	Below	Bacteria	Acidobacteriota	Vicinamibacteria	Vicinamibacterales	Vicinamibacteraceae	Vicinamibacteraceae	uncultured_Acidobacteria
ASV_339	0.37037	0.000130945	Above	Bacteria	Bacteroidota	Bacteroidia	Cytophagales	Microscillaceae	uncultured	uncultured_bacterium
ASV_352	0.703704	0.000925965	no	Bacteria	Proteobacteria	Alphaproteobacteria	Caulobacterales	Hyphomonadaceae	SWB02	uncultured_bacterium
ASV_354	0.703704	0.000604839	no	Bacteria	Nitrospirota	Nitrospiria	Nitrospirales	Nitrospiraceae	Nitrospira	uncultured_bacterium
ASV_357	0.592593	0.00150742	Below	Bacteria	Acidobacteriota	Acidobacteriae	Bryobacterales	Bryobacteraceae	Bryobacter	uncultured_bacterium
ASV_358	0.407407	0.000609516	no	Bacteria	Proteobacteria	Gammaproteobacteria	Burkholderiales	TRA3-20	TRA3-20	metagenome
ASV_364	0.592593	0.001152	Below	Bacteria	Proteobacteria	Alphaproteobacteria	Rhizobiales	Xanthobacteraceae	Bradyrhizobium	uncultured_bacterium
ASV_366	0.740741	0.000788785	no	Bacteria	Desulfobacterota	Desulfuromonadia	PB19	PB19	PB19	uncultured_bacterium
ASV_371	0.518519	0.000419334	no	Bacteria	Bacteroidota	Bacteroidia	Flavobacteriales	NS9_marine_group	NS9_marine_group	metagenome
ASV_384	0.666667	0.000709283	no	Bacteria	Proteobacteria	Gammaproteobacteria	Burkholderiales	Methylophilaceae	uncultured	metagenome
ASV_389	0.666667	0.00110523	no	Bacteria	Proteobacteria	Gammaproteobacteria	Burkholderiales	TRA3-20	TRA3-20	uncultured_bacterium
ASV_390	0.925926	0.00215279	no	Bacteria	Proteobacteria	Alphaproteobacteria	Rhizobiales	A0839	A0839	uncultured_bacterium
ASV_392	0.518519	0.000830874	no	Bacteria	Proteobacteria	Gammaproteobacteria	Burkholderiales	TRA3-20	TRA3-20	uncultured_bacterium
ASV_401	0.333333	5.76779481615544e-05	Above	Bacteria	Latescibacterota	Latescibacterota	Latescibacterota	Latescibacterota	Latescibacterota	uncultured_Latescibacteria
ASV_405	0.333333	0.000257212	no	Bacteria	Proteobacteria	Alphaproteobacteria	Rhizobiales	KF-JG30-B3	KF-JG30-B3	uncultured_bacterium
ASV_419	0.333333	0.00140142	Below	Bacteria	Acidobacteriota	Vicinamibacteria	Vicinamibacterales	Vicinamibacteraceae	Vicinamibacteraceae	uncultured_Acidobacteria
ASV_429	0.777778	0.00108185	no	Bacteria	Proteobacteria	Alphaproteobacteria	Rhizobiales	A0839	A0839	uncultured_bacterium
ASV_430	0.333333	0.00120812	Below	Bacteria	Verrucomicrobiota	Verrucomicrobiae	Verrucomicrobiales	Verrucomicrobiaceae	Brevifollis	uncultured_Prosthecobacter
ASV_431	0.62963	0.000470777	no	Bacteria	Proteobacteria	Alphaproteobacteria	Micavibrionales	Micavibrionaceae	uncultured	uncultured_bacterium
ASV_436	0.851852	0.00128139	no	Bacteria	Bacteroidota	Bacteroidia	Chitinophagales	Saprospiraceae	uncultured	uncultured_bacterium
ASV_441	0.555556	0.00112394	Below	Bacteria	Proteobacteria	Alphaproteobacteria	Rhizobiales	Xanthobacteraceae	Afipia	Afipia_sp.
ASV_451	0.518519	0.00100547	Below	Bacteria	Proteobacteria	Alphaproteobacteria	Rhizobiales	Xanthobacteraceae	uncultured	uncultured_Methylocystaceae
ASV_458	0.777778	0.00127359	no	Bacteria	Planctomycetota	Planctomycetes	Gemmatales	Gemmataceae	Gemmata	bacterium_enrichment
ASV_464	0.444444	0.000272801	no	Bacteria	Bdellovibrionota	Oligoflexia	053A03-B-DI-P58	053A03-B-DI-P58	053A03-B-DI-P58	uncultured_delta
ASV_479	0.555556	0.000734225	no	Bacteria	Proteobacteria	Gammaproteobacteria	JTB23	JTB23	JTB23	metagenome
ASV_489	0.592593	0.000774755	no	Bacteria	Proteobacteria	Alphaproteobacteria	Reyranellales	Reyranellaceae	Reyranella	uncultured_bacterium
ASV_499	0.777778	0.00058925	Above	Bacteria	Bacteroidota	Bacteroidia	Chitinophagales	Saprospiraceae	uncultured	uncultured_Saprospiraceae
ASV_501	0.37037	0.00012315	Above	Bacteria	Proteobacteria	Gammaproteobacteria	Burkholderiales	Comamonadaceae	uncultured	uncultured_bacterium
ASV_502	0.481481	0.000531572	no	Bacteria	Proteobacteria	Gammaproteobacteria	Burkholderiales	Comamonadaceae	uncultured	metagenome
ASV_511	0.777778	0.00113485	no	Bacteria	Cyanobacteria	Sericytochromatia	Sericytochromatia	Sericytochromatia	Sericytochromatia	uncultured_bacterium
ASV_513	0.407407	0.00222294	Below	Bacteria	Proteobacteria	Alphaproteobacteria	Rhizobiales	Xanthobacteraceae	uncultured	uncultured_bacterium
ASV_516	0.407407	0.000185505	no	Bacteria	Armatimonadota	uncultured	uncultured	uncultured	uncultured	uncultured_actinobacterium
ASV_519	0.62963	0.000258771	Above	Bacteria	Cyanobacteria	Vampirivibrionia	Obscuribacterales	Obscuribacteraceae	Candidatus_Obscuribacter	uncultured_bacterium
ASV_533	0.666667	0.00132659	Below	Bacteria	Proteobacteria	Alphaproteobacteria	Rhizobiales	Hyphomicrobiaceae	Hyphomicrobium	uncultured_bacterium
ASV_541	0.851852	0.000757608	Above	Bacteria	Myxococcota	Myxococcia	Myxococcales	Myxococcaceae	P3OB-42	uncultured_delta
ASV_542	0.777778	0.000561191	Above	Bacteria	Planctomycetota	Planctomycetes	Planctomycetales	uncultured	uncultured	uncultured_bacterium
ASV_543	0.481481	0.00103041	Below	Bacteria	Planctomycetota	Planctomycetes	Planctomycetales	Schlesneriaceae	Schlesneria	uncultured_bacterium
ASV_545	0.851852	0.000815286	Above	Bacteria	Actinobacteriota	Actinobacteria	Corynebacteriales	Nocardiaceae	Rhodococcus	Rhodococcus_sp.
ASV_546	0.666667	0.000374127	Above	Bacteria	Armatimonadota	Armatimonadia	Armatimonadales	Armatimonadaceae	Armatimonas	uncultured_beta
ASV_552	0.518519	0.000503513	no	Bacteria	Verrucomicrobiota	Verrucomicrobiae	Pedosphaerales	Pedosphaeraceae	Pedosphaeraceae	uncultured_bacterium
ASV_553	0.814815	0.00196573	no	Bacteria	Proteobacteria	Gammaproteobacteria	Burkholderiales	Comamonadaceae	Leptothrix	uncultured_bacterium
ASV_560	0.518519	0.000579897	no	Bacteria	Acidobacteriota	Vicinamibacteria	Subgroup_17	Subgroup_17	Subgroup_17	uncultured_Acidobacteria
ASV_562	0.814815	0.000654723	Above	Bacteria	Planctomycetota	Planctomycetes	Gemmatales	Gemmataceae	Gemmata	uncultured_bacterium
ASV_564	0.740741	0.00053469	Above	Bacteria	Bacteroidota	Bacteroidia	Chitinophagales	Chitinophagaceae	uncultured	uncultured_Bacteroidetes
ASV_570	0.555556	0.000611074	no	Bacteria	Proteobacteria	Alphaproteobacteria	Rhizobiales	Beijerinckiaceae	Methylobacterium-Methylorubrum	Methylobacterium_sp.
ASV_574	0.444444	0.000269683	no	Bacteria	Planctomycetota	Phycisphaerae	Phycisphaerales	Phycisphaeraceae	SM1A02	uncultured_planctomycete
ASV_577	0.62963	0.000346068	Above	Bacteria	Proteobacteria	Alphaproteobacteria	Sphingomonadales	Sphingomonadaceae	uncultured	uncultured_bacterium
ASV_578	0.592593	0.000526896	no	Bacteria	Acidobacteriota	Subgroup_5	Subgroup_5	Subgroup_5	Subgroup_5	uncultured_bacterium
ASV_584	0.555556	0.000275919	Above	Bacteria	Bacteroidota	Bacteroidia	Flavobacteriales	Flavobacteriaceae	Flavobacterium	uncultured_bacterium
ASV_588	0.555556	0.0002198	Above	Bacteria	Verrucomicrobiota	Verrucomicrobiae	Opitutales	Opitutaceae	Lacunisphaera	metagenome
ASV_592	0.407407	0.000405305	no	Bacteria	Acidobacteriota	Blastocatellia	Blastocatellales	Blastocatellaceae	Stenotrophobacter	uncultured_Acidobacteria
ASV_600	0.555556	0.000299302	Above	Bacteria	Planctomycetota	Planctomycetes	Planctomycetales	uncultured	uncultured	uncultured_bacterium
ASV_614	0.62963	0.00080905	no	Bacteria	Planctomycetota	Planctomycetes	Planctomycetales	Schlesneriaceae	Schlesneria	uncultured_bacterium
ASV_616	0.481481	0.000757608	Below	Bacteria	Acidobacteriota	Vicinamibacteria	Vicinamibacterales	uncultured	uncultured	uncultured_Acidobacteria
ASV_617	0.62963	0.000662517	no	Bacteria	Elusimicrobiota	Elusimicrobia	Lineage_IV	Lineage_IV	Lineage_IV	uncultured_bacterium
ASV_620	0.777778	0.000919729	no	Bacteria	Acidobacteriota	Vicinamibacteria	Vicinamibacterales	uncultured	uncultured	uncultured_bacterium
ASV_623	0.518519	0.000197976	Above	Bacteria	Bacteroidota	Bacteroidia	Chitinophagales	Saprospiraceae	uncultured	uncultured_Saprospiraceae
ASV_630	0.703704	0.00027436	Above	Bacteria	Bacteroidota	Bacteroidia	Chitinophagales	Chitinophagaceae	Lacibacter	uncultured_bacterium
ASV_632	0.666667	0.00176775	Below	Bacteria	Bdellovibrionota	Bdellovibrionia	Bdellovibrionales	Bdellovibrionaceae	OM27_clade	uncultured_bacterium
ASV_636	0.481481	0.000336715	no	Bacteria	Armatimonadota	Fimbriimonadia	Fimbriimonadales	Fimbriimonadales	Fimbriimonadales	uncultured_bacterium
ASV_641	0.407407	0.000509748	no	Bacteria	Proteobacteria	Alphaproteobacteria	Rhodobacterales	Rhodobacteraceae	Pseudorhodobacter	uncultured_bacterium
ASV_642	0.555556	0.000372568	no	Bacteria	Planctomycetota	Planctomycetes	Planctomycetales	uncultured	uncultured	metagenome
ASV_644	0.518519	0.000420893	no	Bacteria	Proteobacteria	Gammaproteobacteria	Burkholderiales	Nitrosomonadaceae	Ellin6067	uncultured_bacterium
ASV_650	0.814815	0.00113953	no	Bacteria	Latescibacterota	Latescibacterota	Latescibacterota	Latescibacterota	Latescibacterota	uncultured_Latescibacteria
ASV_656	0.333333	0.000327361	no	Bacteria	Proteobacteria	Gammaproteobacteria	Steroidobacterales	Steroidobacteraceae	uncultured	uncultured_bacterium
ASV_659	0.62963	0.000355421	Above	Bacteria	Proteobacteria	Alphaproteobacteria	Thalassobaculales	uncultured	uncultured	metagenome
ASV_660	0.703704	0.000844904	no	Bacteria	Verrucomicrobiota	Verrucomicrobiae	Pedosphaerales	Pedosphaeraceae	Oikopleura	metagenome
ASV_663	0.740741	0.00122059	no	Bacteria	Planctomycetota	Planctomycetes	Pirellulales	Pirellulaceae	uncultured	uncultured_bacterium
ASV_669	0.814815	0.000777873	no	Bacteria	Proteobacteria	Alphaproteobacteria	Rhodospirillales	uncultured	uncultured	uncultured_bacterium
ASV_673	0.407407	0.000689018	Below	Bacteria	Proteobacteria	Gammaproteobacteria	CCD24	CCD24	CCD24	metagenome
ASV_674	0.444444	0.000213564	no	Bacteria	Bacteroidota	Bacteroidia	Sphingobacteriales	AKYH767	AKYH767	uncultured_bacterium
ASV_676	0.62963	0.000293066	Above	Bacteria	Bdellovibrionota	Bdellovibrionia	Bdellovibrionales	Bdellovibrionaceae	OM27_clade	uncultured_bacterium
ASV_688	0.407407	0.000330479	no	Bacteria	Dependentiae	Babeliae	Babeliales	Babeliales	Babeliales	uncultured_bacterium
ASV_698	0.851852	0.000338273	Above	Bacteria	Proteobacteria	Alphaproteobacteria	Rhizobiales	Xanthobacteraceae	Bradyrhizobium	Bradyrhizobium_sp.
ASV_701	0.37037	0.000202652	no	Bacteria	Bacteroidota	Bacteroidia	Chitinophagales	Chitinophagaceae	Ferruginibacter	uncultured_bacterium
ASV_702	0.333333	0.000268125	no	Bacteria	Proteobacteria	Gammaproteobacteria	Legionellales	Legionellaceae	Legionella	uncultured_bacterium
ASV_709	0.962963	0.000578338	Above	Bacteria	Verrucomicrobiota	Chlamydiae	Chlamydiales	Simkaniaceae	uncultured	Rhabdochlamydiaceae_bacterium
ASV_710	0.555556	0.000176152	Above	Bacteria	Proteobacteria	Alphaproteobacteria	Rhizobiales	Xanthobacteraceae	Afipia	Afipia_sp.
ASV_714	0.740741	0.000413099	Above	Bacteria	Planctomycetota	Phycisphaerae	Phycisphaerales	Phycisphaeraceae	SM1A02	metagenome
ASV_720	0.518519	0.000897905	Below	Bacteria	Proteobacteria	Gammaproteobacteria	Burkholderiales	TRA3-20	TRA3-20	uncultured_bacterium
ASV_722	0.407407	0.00016524	Above	Bacteria	Proteobacteria	Alphaproteobacteria	Rickettsiales	SM2D12	SM2D12	metagenome
ASV_723	0.777778	0.00135933	no	Bacteria	Planctomycetota	Planctomycetes	Planctomycetales	Schlesneriaceae	Schlesneria	uncultured_bacterium
ASV_744	0.333333	0.000296184	no	Bacteria	Acidobacteriota	Vicinamibacteria	Vicinamibacterales	Vicinamibacteraceae	Vicinamibacteraceae	uncultured_Acidobacteria
ASV_753	0.814815	0.00118785	no	Bacteria	Hydrogenedentes	Hydrogenedentia	Hydrogenedentiales	Hydrogenedensaceae	Hydrogenedensaceae	metagenome
ASV_768	0.333333	0.000229153	no	Bacteria	SAR324_clade(Marine_group_B)	SAR324_clade(Marine_group_B)	SAR324_clade(Marine_group_B)	SAR324_clade(Marine_group_B)	SAR324_clade(Marine_group_B)	uncultured_bacterium
ASV_769	0.37037	0.000361656	no	Bacteria	Bacteroidota	Bacteroidia	Sphingobacteriales	AKYH767	AKYH767	metagenome
ASV_770	0.333333	0.000473894	no	Bacteria	Actinobacteriota	Actinobacteria	Corynebacteriales	Mycobacteriaceae	Mycobacterium	uncultured_bacterium
ASV_786	0.62963	0.000511307	no	Bacteria	Proteobacteria	Gammaproteobacteria	Burkholderiales	Comamonadaceae	Rubrivivax	uncultured_bacterium
ASV_787	0.481481	0.000120032	Above	Bacteria	Planctomycetota	Planctomycetes	Planctomycetales	Rubinisphaeraceae	SH-PL14	uncultured_bacterium
ASV_796	0.333333	0.000134062	no	Bacteria	Proteobacteria	Gammaproteobacteria	Gammaproteobacteria_Incertae_Sedis	Unknown_Family	uncultured	uncultured_bacterium
ASV_804	0.62963	0.000785667	no	Bacteria	Patescibacteria	Parcubacteria	Parcubacteria	Parcubacteria	Parcubacteria	uncultured_bacterium
ASV_834	0.703704	0.00127359	no	Bacteria	Planctomycetota	Planctomycetes	Pirellulales	Pirellulaceae	uncultured	metagenome
ASV_863	0.666667	0.000732666	no	Bacteria	Bdellovibrionota	Bdellovibrionia	Bdellovibrionales	Bdellovibrionaceae	OM27_clade	uncultured_bacterium
ASV_867	0.666667	0.000788785	no	Bacteria	Planctomycetota	Planctomycetes	Planctomycetales	uncultured	uncultured	uncultured_bacterium
ASV_870	0.518519	0.00103197	Below	Bacteria	Planctomycetota	Planctomycetes	Planctomycetales	Schlesneriaceae	Schlesneria	uncultured_bacterium
ASV_872	0.518519	0.000386598	no	Bacteria	Proteobacteria	Alphaproteobacteria	uncultured	uncultured	uncultured	Lacibacterium_aquatile
ASV_877	0.555556	0.000662517	no	Bacteria	Proteobacteria	Alphaproteobacteria	Rhizobiales	Xanthobacteraceae	Afipia	uncultured_bacterium
ASV_891	0.814815	0.000821521	no	Bacteria	Planctomycetota	Planctomycetes	Pirellulales	Pirellulaceae	Pirellula	metagenome
ASV_892	0.555556	0.000701489	no	Bacteria	Patescibacteria	Parcubacteria	Parcubacteria	Parcubacteria	Parcubacteria	uncultured_bacterium
ASV_895	0.37037	0.000303978	no	Bacteria	Acidobacteriota	Vicinamibacteria	Vicinamibacterales	uncultured	uncultured	uncultured_bacterium
ASV_899	0.814815	0.000628222	Above	Bacteria	Proteobacteria	Alphaproteobacteria	Rhizobiales	Beijerinckiaceae	Bosea	Bosea_sp.
ASV_907	0.481481	0.000704606	no	Bacteria	Verrucomicrobiota	Verrucomicrobiae	Verrucomicrobiales	Verrucomicrobiaceae	Prosthecobacter	uncultured_bacterium
ASV_918	0.777778	0.000497277	Above	Bacteria	Proteobacteria	Gammaproteobacteria	Burkholderiales	Comamonadaceae	Leptothrix	uncultured_bacterium
ASV_923	0.518519	0.000232271	Above	Bacteria	Verrucomicrobiota	Verrucomicrobiae	Pedosphaerales	Pedosphaeraceae	Ellin517	uncultured_bacterium
ASV_940	0.592593	0.000403746	no	Bacteria	Elusimicrobiota	Lineage_IIb	Lineage_IIb	Lineage_IIb	Lineage_IIb	uncultured_soil
ASV_946	0.740741	0.000911935	no	Bacteria	Gemmatimonadota	Gemmatimonadetes	Gemmatimonadales	Gemmatimonadaceae	Gemmatimonas	uncultured_bacterium
ASV_952	0.666667	0.000872964	no	Bacteria	Planctomycetota	Phycisphaerae	Tepidisphaerales	WD2101_soil_group	WD2101_soil_group	uncultured_bacterium
ASV_961	0.444444	0.000989878	Below	Bacteria	Planctomycetota	Planctomycetes	Pirellulales	Pirellulaceae	uncultured	metagenome
ASV_963	0.518519	0.000478571	no	Bacteria	Proteobacteria	Alphaproteobacteria	Rhizobiales	Xanthobacteraceae	Xanthobacteraceae	uncultured_bacterium
ASV_981	0.777778	0.000723313	no	Bacteria	Planctomycetota	Planctomycetes	Pirellulales	Pirellulaceae	Pirellula	uncultured_bacterium
ASV_999	0.481481	0.000221359	Above	Bacteria	Planctomycetota	Planctomycetes	Planctomycetales	uncultured	uncultured	uncultured_planctomycete
ASV_1004	0.518519	0.000439599	no	Bacteria	Acidobacteriota	Blastocatellia	45597	45597	45597	uncultured_bacterium
ASV_1008	0.481481	0.000155886	Above	Bacteria	Armatimonadota	Armatimonadia	Armatimonadales	Armatimonadaceae	Armatimonas	uncultured_bacterium
ASV_1009	0.481481	0.000196417	Above	Bacteria	Bacteroidota	Bacteroidia	Bacteroidetes_VC2.1_Bac22	Bacteroidetes_VC2.1_Bac22	Bacteroidetes_VC2.1_Bac22	metagenome
ASV_1025	0.518519	0.00063134	no	Bacteria	Planctomycetota	Planctomycetes	Planctomycetales	uncultured	uncultured	uncultured_bacterium
ASV_1074	0.666667	0.000289949	Above	Bacteria	Planctomycetota	vadinHA49	vadinHA49	vadinHA49	vadinHA49	uncultured_bacterium
ASV_1081	0.777778	0.000625104	Above	Bacteria	Bdellovibrionota	Bdellovibrionia	Bdellovibrionales	Bdellovibrionaceae	Bdellovibrio	uncultured_bacterium
ASV_1103	0.851852	0.00035698	Above	Bacteria	Dependentiae	Babeliae	Babeliales	Babeliales	Babeliales	uncultured_organism
ASV_1109	0.777778	0.000508189	Above	Bacteria	Myxococcota	Polyangia	VHS-B3-70	VHS-B3-70	VHS-B3-70	uncultured_bacterium
ASV_1117	0.518519	0.000517543	no	Bacteria	Bacteroidota	Bacteroidia	Cytophagales	Microscillaceae	OLB12	uncultured_bacterium
ASV_1125	0.37037	0.000296184	no	Bacteria	Verrucomicrobiota	Verrucomicrobiae	Pedosphaerales	Pedosphaeraceae	Oikopleura	uncultured_bacterium
ASV_1131	0.814815	0.000957142	no	Bacteria	Elusimicrobiota	Elusimicrobia	Lineage_IV	Lineage_IV	Lineage_IV	uncultured_bacterium
ASV_1133	0.407407	0.000243183	no	Bacteria	Bacteroidota	Bacteroidia	Cytophagales	Microscillaceae	uncultured	uncultured_bacterium
ASV_1144	0.740741	0.000498836	Above	Bacteria	Myxococcota	Polyangia	Blfdi19	Blfdi19	Blfdi19	metagenome
ASV_1145	0.592593	0.000155886	Above	Bacteria	Cyanobacteria	Vampirivibrionia	Vampirovibrionales	Vampirovibrionaceae	Vampirovibrionaceae	uncultured_cyanobacterium
ASV_1149	0.518519	0.000360097	no	Bacteria	Planctomycetota	Planctomycetes	Planctomycetales	uncultured	uncultured	uncultured_bacterium
ASV_1172	0.481481	0.000607957	no	Bacteria	Proteobacteria	Alphaproteobacteria	Rhizobiales	Hyphomicrobiaceae	Hyphomicrobium	uncultured_bacterium
ASV_1173	0.814815	0.00042557	Above	Bacteria	Bdellovibrionota	Bdellovibrionia	Bdellovibrionales	Bdellovibrionaceae	Bdellovibrio	uncultured_soil
ASV_1179	0.37037	0.000226035	no	Bacteria	Bacteroidota	Bacteroidia	Flavobacteriales	NS9_marine_group	NS9_marine_group	metagenome
ASV_1189	0.444444	0.000512866	no	Bacteria	Bacteroidota	Bacteroidia	Flavobacteriales	Flavobacteriaceae	Flavobacterium	uncultured_Bacteroidetes
ASV_1194	0.444444	0.000291507	no	Bacteria	Verrucomicrobiota	Kiritimatiellae	WCHB1-41	WCHB1-41	WCHB1-41	metagenome
ASV_1199	0.518519	0.000272801	Above	Bacteria	Bacteroidota	Bacteroidia	Sphingobacteriales	AKYH767	AKYH767	uncultured_bacterium
ASV_1208	0.555556	0.000243183	Above	Bacteria	Proteobacteria	Gammaproteobacteria	Burkholderiales	Methylophilaceae	uncultured	uncultured_bacterium
ASV_1209	0.333333	0.000537808	Below	Bacteria	Proteobacteria	Alphaproteobacteria	Acetobacterales	Acetobacteraceae	uncultured	uncultured_bacterium
ASV_1239	0.703704	0.000448953	Above	Bacteria	Proteobacteria	Alphaproteobacteria	Ferrovibrionales	Ferrovibrionaceae	Ferrovibrio	uncultured_bacterium
ASV_1269	0.481481	0.000352303	no	Bacteria	Proteobacteria	Alphaproteobacteria	Reyranellales	Reyranellaceae	Reyranella	metagenome
ASV_1277	0.333333	0.000291507	no	Bacteria	Bacteroidota	Bacteroidia	Sphingobacteriales	LiUU-11-161	LiUU-11-161	uncultured_bacterium
ASV_1279	0.333333	0.000506631	Below	Bacteria	Dependentiae	Babeliae	Babeliales	UBA12409	UBA12409	uncultured_soil
ASV_1286	0.740741	0.000618869	no	Bacteria	Planctomycetota	Planctomycetes	Pirellulales	Pirellulaceae	Pirellula	uncultured_bacterium
ASV_1291	0.518519	0.000436482	no	Bacteria	Bacteroidota	Bacteroidia	Chitinophagales	Saprospiraceae	uncultured	uncultured_bacterium
ASV_1313	0.740741	0.000530014	Above	Bacteria	Proteobacteria	Alphaproteobacteria	Rhizobiales	Rhizobiaceae	Allorhizobium-Neorhizobium-Pararhizobium-Rhizobium	alpha_proteobacterium
ASV_1320	0.814815	0.000503513	Above	Bacteria	Proteobacteria	Gammaproteobacteria	Diplorickettsiales	Diplorickettsiaceae	Aquicella	uncultured_bacterium
ASV_1330	0.666667	0.00035698	Above	Bacteria	Bacteroidota	Bacteroidia	Chitinophagales	Chitinophagaceae	Sediminibacterium	uncultured_bacterium
ASV_1353	0.62963	0.00042557	no	Bacteria	Planctomycetota	Planctomycetes	Planctomycetales	Schlesneriaceae	Schlesneria	uncultured_bacterium
ASV_1369	0.481481	0.00017771	Above	Bacteria	Proteobacteria	Gammaproteobacteria	Diplorickettsiales	Diplorickettsiaceae	Aquicella	uncultured_bacterium
ASV_1372	0.444444	0.000216682	no	Bacteria	Bacteroidota	Bacteroidia	Sphingobacteriales	KD3-93	KD3-93	uncultured_bacterium
ASV_1403	0.481481	0.000280595	no	Bacteria	Proteobacteria	Gammaproteobacteria	Gammaproteobacteria_Incertae_Sedis	Unknown_Family	Candidatus_Berkiella	uncultured_bacterium
ASV_1404	0.703704	0.000361656	Above	Bacteria	Proteobacteria	Alphaproteobacteria	uncultured	uncultured	uncultured	uncultured_bacterium
ASV_1409	0.37037	0.000149651	no	Bacteria	Planctomycetota	Planctomycetes	Planctomycetales	uncultured	uncultured	uncultured_bacterium
ASV_1416	0.37037	0.000299302	no	Bacteria	Bdellovibrionota	Bdellovibrionia	Bdellovibrionales	Bdellovibrionaceae	OM27_clade	uncultured_bacterium
ASV_1425	0.407407	0.000508189	no	Bacteria	Planctomycetota	OM190	OM190	OM190	OM190	uncultured_bacterium
ASV_1435	0.62963	0.000360097	Above	Bacteria	Proteobacteria	Alphaproteobacteria	Caulobacterales	Hyphomonadaceae	SWB02	uncultured_bacterium
ASV_1447	0.407407	0.000162122	Above	Bacteria	Bacteroidota	Kapabacteria	Kapabacteriales	Kapabacteriales	Kapabacteriales	uncultured_bacterium
ASV_1465	0.703704	0.000584574	no	Bacteria	Myxococcota	Polyangia	Blfdi19	Blfdi19	Blfdi19	uncultured_delta
ASV_1466	0.481481	0.00037101	no	Bacteria	Bacteroidota	Bacteroidia	Chitinophagales	Saprospiraceae	uncultured	uncultured_bacterium
ASV_1492	0.666667	0.000547161	no	Bacteria	Verrucomicrobiota	Verrucomicrobiae	Chthoniobacterales	Chthoniobacteraceae	Chthoniobacter	uncultured_bacterium
ASV_1501	0.851852	0.00065784	Above	Bacteria	Proteobacteria	Alphaproteobacteria	Rhodospirillales	uncultured	uncultured	uncultured_bacterium
ASV_1503	0.555556	0.000512866	no	Bacteria	Planctomycetota	Phycisphaerae	Phycisphaerales	Phycisphaeraceae	SM1A02	uncultured_bacterium
ASV_1522	0.333333	0.00027436	no	Bacteria	Patescibacteria	Parcubacteria	Candidatus_Kaiserbacteria	Candidatus_Kaiserbacteria	Candidatus_Kaiserbacteria	groundwater_metagenome
ASV_1540	0.555556	0.000448953	no	Bacteria	Bdellovibrionota	Oligoflexia	0319-6G20	0319-6G20	0319-6G20	uncultured_bacterium
ASV_1562	0.592593	0.000296184	Above	Bacteria	Planctomycetota	Planctomycetes	Pirellulales	Pirellulaceae	Pirellula	uncultured_bacterium
ASV_1614	0.444444	0.000102885	Above	Bacteria	Planctomycetota	OM190	OM190	OM190	OM190	uncultured_bacterium
ASV_1629	0.481481	0.000190181	Above	Bacteria	Planctomycetota	Planctomycetes	Gemmatales	Gemmataceae	uncultured	uncultured_bacterium
ASV_1635	0.444444	0.000360097	no	Bacteria	Planctomycetota	Planctomycetes	Gemmatales	Gemmataceae	Gemmata	uncultured_bacterium
ASV_1646	0.481481	0.000303978	no	Bacteria	Proteobacteria	Gammaproteobacteria	JTB23	JTB23	JTB23	metagenome
ASV_1648	0.481481	0.000258771	no	Bacteria	Planctomycetota	Planctomycetes	Planctomycetales	Rubinisphaeraceae	uncultured	uncultured_planctomycete
ASV_1666	0.444444	0.000271242	no	Bacteria	Proteobacteria	Alphaproteobacteria	Rickettsiales	Rickettsiaceae	Candidatus_Megaira	uncultured_bacterium
ASV_1688	0.407407	0.000201093	no	Bacteria	Planctomycetota	Phycisphaerae	Tepidisphaerales	WD2101_soil_group	WD2101_soil_group	uncultured_Planctomycetales
ASV_1698	0.703704	0.000441158	Above	Bacteria	Bdellovibrionota	Bdellovibrionia	Bdellovibrionales	Bdellovibrionaceae	Bdellovibrio	uncultured_bacterium
ASV_1748	0.518519	0.000232271	Above	Bacteria	Planctomycetota	OM190	OM190	OM190	OM190	uncultured_bacterium
ASV_1913	0.592593	0.00020577	Above	Bacteria	Dependentiae	Babeliae	Babeliales	Vermiphilaceae	Vermiphilaceae	metagenome
ASV_1917	0.333333	0.000182387	no	Bacteria	Verrucomicrobiota	Verrucomicrobiae	Pedosphaerales	Pedosphaeraceae	DEV114	uncultured_bacterium
ASV_1959	0.666667	7.79431731912897e-05	Above	Bacteria	Proteobacteria	Alphaproteobacteria	Rhizobiales	Rhizobiaceae	Allorhizobium-Neorhizobium-Pararhizobium-Rhizobium	uncultured_bacterium
ASV_1987	0.407407	0.000244742	no	Bacteria	Planctomycetota	Planctomycetes	Gemmatales	Gemmataceae	Telmatocola	metagenome
ASV_1994	0.518519	0.000240065	Above	Bacteria	Proteobacteria	Alphaproteobacteria	Rickettsiales	AB1	AB1	uncultured_bacterium
ASV_2005	0.592593	0.000187064	Above	Bacteria	Proteobacteria	Gammaproteobacteria	Aeromonadales	Aeromonadaceae	Aeromonas	Aeromonas_hydrophila
ASV_2011	0.703704	0.000238506	Above	Bacteria	Dependentiae	Babeliae	Babeliales	Vermiphilaceae	Vermiphilaceae	uncultured_proteobacterium
ASV_2019	0.703704	0.000269683	Above	Bacteria	Planctomycetota	Planctomycetes	Pirellulales	Pirellulaceae	uncultured	uncultured_bacterium
ASV_2030	0.407407	0.000332038	no	Bacteria	Proteobacteria	Alphaproteobacteria	Rhizobiales	Hyphomicrobiaceae	Hyphomicrobium	uncultured_bacterium
ASV_2071	0.407407	0.000377245	no	Bacteria	Verrucomicrobiota	Verrucomicrobiae	Pedosphaerales	Pedosphaeraceae	Pedosphaeraceae	uncultured_bacterium
ASV_2098	0.555556	0.000272801	Above	Bacteria	Bdellovibrionota	Bdellovibrionia	Bdellovibrionales	Bdellovibrionaceae	Bdellovibrio	uncultured_bacterium
ASV_2117	0.333333	0.000188622	no	Bacteria	Patescibacteria	Saccharimonadia	Saccharimonadales	Saccharimonadales	Saccharimonadales	uncultured_candidate
ASV_2196	0.444444	0.000330479	no	Bacteria	Hydrogenedentes	Hydrogenedentia	Hydrogenedentiales	Hydrogenedensaceae	Hydrogenedensaceae	metagenome
ASV_2200	0.592593	0.000127827	Above	Bacteria	Bacteroidota	Bacteroidia	Bacteroidetes_VC2.1_Bac22	Bacteroidetes_VC2.1_Bac22	Bacteroidetes_VC2.1_Bac22	uncultured_bacterium
ASV_2361	0.518519	0.000154327	Above	Bacteria	Patescibacteria	Parcubacteria	Candidatus_Nomurabacteria	Candidatus_Nomurabacteria	Candidatus_Nomurabacteria	uncultured_bacterium
ASV_2408	0.37037	5.76779481615544e-05	Above	Bacteria	Bacteroidota	Bacteroidia	Chitinophagales	Saprospiraceae	uncultured	uncultured_bacterium
ASV_2530	0.555556	0.000207329	Above	Bacteria	Proteobacteria	Gammaproteobacteria	uncultured	uncultured	uncultured	uncultured_bacterium
ASV_2551	0.333333	0.000183946	no	Bacteria	Bdellovibrionota	Oligoflexia	Silvanigrellales	Silvanigrellaceae	Silvanigrella	uncultured_Myxococcales
ASV_2623	0.444444	0.000222917	no	Bacteria	Bacteroidota	Bacteroidia	Chitinophagales	uncultured	uncultured	metagenome
ASV_2624	0.37037	0.000226035	no	Bacteria	Verrucomicrobiota	Verrucomicrobiae	Chthoniobacterales	Chthoniobacteraceae	Chthoniobacter	metagenome
ASV_2660	0.481481	0.000207329	Above	Bacteria	Proteobacteria	Alphaproteobacteria	Paracaedibacterales	Paracaedibacteraceae	uncultured	uncultured_bacterium
ASV_2753	0.555556	0.000173034	Above	Bacteria	Proteobacteria	Alphaproteobacteria	Paracaedibacterales	Paracaedibacteraceae	uncultured	uncultured_bacterium
ASV_2801	0.37037	0.00020577	no	Bacteria	Proteobacteria	Alphaproteobacteria	Rhodospirillales	uncultured	uncultured	uncultured_bacterium
ASV_2985	0.444444	0.00013718	Above	Bacteria	Patescibacteria	Parcubacteria	Candidatus_Kaiserbacteria	Candidatus_Kaiserbacteria	Candidatus_Kaiserbacteria	groundwater_metagenome
ASV_3108	0.518519	0.000152769	Above	Bacteria	Bdellovibrionota	Oligoflexia	0319-6G20	0319-6G20	0319-6G20	uncultured_bacterium
ASV_3236	0.37037	7.95020366551155e-05	Above	Bacteria	Planctomycetota	Planctomycetes	Planctomycetales	uncultured	uncultured	uncultured_bacterium
ASV_3552	0.407407	2.80595423488643e-05	Above	Bacteria	Proteobacteria	Alphaproteobacteria	Rhizobiales	Xanthobacteraceae	uncultured	uncultured_bacterium
ASV_3926	0.333333	4.67659039147738e-05	Above	Bacteria	SAR324_clade(Marine_group_B)	SAR324_clade(Marine_group_B)	SAR324_clade(Marine_group_B)	SAR324_clade(Marine_group_B)	SAR324_clade(Marine_group_B)	uncultured_bacterium

## Sheet: Core microbiome data seeding co
Core microbiome seeding community (supplementary fig x)
otu	otu_occ	otu_rel	Neutral	Kingdom	Phylum	Class	Order	Family	Genus	Otus
ASV_1	1	0.197299	no	Bacteria	Proteobacteria	Alphaproteobacteria	SAR11_clade	Clade_III	Clade_III	uncultured_bacterium
ASV_2	0.344828	0.000242353	Above	Bacteria	Proteobacteria	Gammaproteobacteria	Beggiatoales	Beggiatoaceae	uncultured	uncultured_gamma
ASV_4	0.965517	0.00645197	no	Bacteria	Proteobacteria	Gammaproteobacteria	Burkholderiales	Comamonadaceae	Rhodoferax	uncultured_bacterium
ASV_5	0.931034	0.0125889	no	Bacteria	Proteobacteria	Gammaproteobacteria	Burkholderiales	Comamonadaceae	Aquabacterium	uncultured_bacterium
ASV_8	1	0.0443815	no	Bacteria	Proteobacteria	Gammaproteobacteria	Burkholderiales	Methylophilaceae	Candidatus_Methylopumilus	uncultured_bacterium
ASV_10	1	0.0352341	no	Bacteria	Actinobacteriota	Actinobacteria	Frankiales	Sporichthyaceae	hgcI_clade	uncultured_bacterium
ASV_12	0.758621	0.0106002	Below	Bacteria	Proteobacteria	Gammaproteobacteria	Burkholderiales	Methylophilaceae	MM1	uncultured_bacterium
ASV_14	0.37931	0.0135408	Below	Bacteria	Proteobacteria	Gammaproteobacteria	Burkholderiales	Comamonadaceae	Aquabacterium	Aquabacterium_olei
ASV_15	0.896552	0.00766643	no	Bacteria	Proteobacteria	Gammaproteobacteria	Burkholderiales	Burkholderiaceae	Polynucleobacter	uncultured_bacterium
ASV_16	0.965517	0.018777	no	Bacteria	Actinobacteriota	Actinobacteria	Frankiales	Sporichthyaceae	hgcI_clade	uncultured_bacterium
ASV_22	0.793103	0.0221874	Below	Bacteria	Proteobacteria	Gammaproteobacteria	Burkholderiales	Comamonadaceae	Hydrogenophaga	uncultured_bacterium
ASV_23	0.965517	0.0115737	no	Bacteria	Proteobacteria	Alphaproteobacteria	Rhizobiales	Rhizobiales_Incertae_Sedis	uncultured	uncultured_bacterium
ASV_25	0.517241	0.00549333	Below	Bacteria	Actinobacteriota	Actinobacteria	Frankiales	Sporichthyaceae	hgcI_clade	uncultured_bacterium
ASV_26	0.965517	0.0146516	no	Bacteria	Proteobacteria	Gammaproteobacteria	Burkholderiales	Comamonadaceae	Limnohabitans	uncultured_bacterium
ASV_27	0.896552	0.00844195	no	Bacteria	Actinobacteriota	Actinobacteria	Frankiales	Sporichthyaceae	Candidatus_Planktophila	uncultured_bacterium
ASV_29	0.586207	0.00701746	Below	Bacteria	Proteobacteria	Gammaproteobacteria	Burkholderiales	Comamonadaceae	Acidovorax	uncultured_bacterium
ASV_31	0.344828	0.0181468	Below	Bacteria	Cyanobacteria	Cyanobacteriia	Cyanobacteriales	Nostocaceae	Aphanizomenon_NIES81	Anabaena_sp.
ASV_32	1	0.00635234	Above	Bacteria	Actinobacteriota	Actinobacteria	Frankiales	Sporichthyaceae	hgcI_clade	uncultured_bacterium
ASV_33	0.413793	0.00787108	Below	Bacteria	Proteobacteria	Gammaproteobacteria	Burkholderiales	Comamonadaceae	Methylibium	uncultured_bacterium
ASV_34	0.310345	0.000394496	no	Bacteria	Bacteroidota	Bacteroidia	Chitinophagales	Chitinophagaceae	Terrimonas	uncultured_bacterium
ASV_35	0.275862	0.000371608	no	Bacteria	Proteobacteria	Alphaproteobacteria	Rhizobiales	A0839	A0839	uncultured_bacterium
ASV_39	0.517241	0.00434889	Below	Bacteria	Proteobacteria	Gammaproteobacteria	Burkholderiales	Comamonadaceae	Comamonas	uncultured_bacterium
ASV_41	0.896552	0.00662027	no	Bacteria	Proteobacteria	Gammaproteobacteria	Burkholderiales	Comamonadaceae	Limnohabitans	uncultured_bacterium
ASV_42	0.37931	0.00170589	Below	Bacteria	Proteobacteria	Gammaproteobacteria	Burkholderiales	Comamonadaceae	Variovorax	Variovorax_sp.
ASV_43	0.965517	0.00958774	no	Bacteria	Proteobacteria	Alphaproteobacteria	Reyranellales	Reyranellaceae	Reyranella	uncultured_bacterium
ASV_45	0.827586	0.00800168	Below	Bacteria	Planctomycetota	Planctomycetes	Pirellulales	Pirellulaceae	uncultured	uncultured_bacterium
ASV_48	0.275862	6.59738070521961e-05	Above	Bacteria	Proteobacteria	Gammaproteobacteria	Burkholderiales	Comamonadaceae	Pelomonas	metagenome
ASV_49	0.37931	0.00107847	no	Bacteria	Proteobacteria	Gammaproteobacteria	Burkholderiales	Comamonadaceae	Rhizobacter	uncultured_bacterium
ASV_51	0.931034	0.00431523	no	Bacteria	Proteobacteria	Gammaproteobacteria	Burkholderiales	TRA3-20	TRA3-20	uncultured_bacterium
ASV_52	0.724138	0.00574376	Below	Bacteria	Bdellovibrionota	Bdellovibrionia	Bdellovibrionales	Bdellovibrionaceae	OM27_clade	uncultured_bacterium
ASV_55	0.965517	0.00553372	no	Bacteria	Proteobacteria	Alphaproteobacteria	Reyranellales	Reyranellaceae	Reyranella	metagenome
ASV_56	0.689655	0.00233197	no	Bacteria	Proteobacteria	Alphaproteobacteria	Rhizobiales	Xanthobacteraceae	Pseudolabrys	uncultured_bacterium
ASV_58	0.793103	0.00272378	no	Bacteria	Proteobacteria	Alphaproteobacteria	Caulobacterales	Hyphomonadaceae	SWB02	uncultured_bacterium
ASV_62	0.862069	0.00448218	no	Bacteria	Actinobacteriota	Actinobacteria	Frankiales	Sporichthyaceae	hgcI_clade	uncultured_actinobacterium
ASV_70	0.931034	0.006009	no	Bacteria	Proteobacteria	Gammaproteobacteria	Burkholderiales	Burkholderiaceae	Polynucleobacter	uncultured_bacterium
ASV_71	0.586207	0.00429503	Below	Bacteria	Actinobacteriota	Actinobacteria	Frankiales	Sporichthyaceae	hgcI_clade	metagenome
ASV_72	0.448276	0.00110944	no	Bacteria	Proteobacteria	Alphaproteobacteria	Rhizobiales	Xanthobacteraceae	Afipia	uncultured_bacterium
ASV_73	0.965517	0.00626751	no	Bacteria	Proteobacteria	Gammaproteobacteria	Burkholderiales	Comamonadaceae	Limnohabitans	uncultured_bacterium
ASV_76	0.689655	0.00662835	Below	Bacteria	Bacteroidota	Bacteroidia	Chitinophagales	uncultured	uncultured	uncultured_bacterium
ASV_78	0.862069	0.0047178	no	Bacteria	Proteobacteria	Alphaproteobacteria	Acetobacterales	Acetobacteraceae	uncultured	uncultured_soil
ASV_80	0.344828	0.00165473	Below	Bacteria	Fibrobacterota	Fibrobacteria	Fibrobacterales	Fibrobacteraceae	uncultured	bacterium_enrichment
ASV_84	0.655172	0.00590533	Below	Bacteria	Proteobacteria	Alphaproteobacteria	Rhizobiales	Hyphomicrobiaceae	Hyphomicrobium	uncultured_bacterium
ASV_85	0.655172	0.00406345	Below	Bacteria	Actinobacteriota	Actinobacteria	Frankiales	Sporichthyaceae	hgcI_clade	uncultured_bacterium
ASV_91	0.655172	0.000432196	Above	Bacteria	Proteobacteria	Gammaproteobacteria	Burkholderiales	Burkholderiaceae	Ralstonia	uncultured_bacterium
ASV_92	0.965517	0.00717095	no	Bacteria	Bacteroidota	Bacteroidia	Chitinophagales	Chitinophagaceae	Sediminibacterium	uncultured_Bacteroidetes
ASV_93	0.965517	0.00754121	no	Bacteria	Planctomycetota	Planctomycetes	Gemmatales	Gemmataceae	uncultured	uncultured_bacterium
ASV_96	0.724138	0.00245719	no	Bacteria	Actinobacteriota	Actinobacteria	Frankiales	Sporichthyaceae	hgcI_clade	uncultured_bacterium
ASV_97	0.551724	0.00316001	Below	Bacteria	Acidobacteriota	Acidobacteriae	Acidobacteriae	Acidobacteriae	Paludibaculum	metagenome
ASV_100	0.448276	0.00044566	no	Bacteria	Proteobacteria	Alphaproteobacteria	Rhizobiales	Xanthobacteraceae	Bradyrhizobium	Bradyrhizobium_sp.
ASV_102	0.862069	0.00241141	no	Bacteria	Acidobacteriota	Acidobacteriae	Bryobacterales	Bryobacteraceae	Bryobacter	metagenome
ASV_104	0.413793	0.00218117	Below	Bacteria	Actinobacteriota	Actinobacteria	Frankiales	Sporichthyaceae	hgcI_clade	Candidatus_Planktophila
ASV_106	0.896552	0.0058784	no	Bacteria	Acidobacteriota	Acidobacteriae	Solibacterales	Solibacteraceae	Candidatus_Solibacter	uncultured_bacterium
ASV_108	0.758621	0.00234678	no	Bacteria	Chloroflexi	SL56_marine_group	SL56_marine_group	SL56_marine_group	SL56_marine_group	uncultured_bacterium
ASV_109	0.344828	0.0022835	Below	Bacteria	Proteobacteria	Gammaproteobacteria	Burkholderiales	Comamonadaceae	Rhizobacter	uncultured_bacterium
ASV_110	0.310345	0.00135448	Below	Bacteria	Proteobacteria	Alphaproteobacteria	Rhizobiales	Hyphomicrobiaceae	Pedomicrobium	Pedomicrobium_australicum
ASV_114	0.689655	0.00197652	no	Bacteria	Proteobacteria	Alphaproteobacteria	Rhizobiales	Beijerinckiaceae	alphaI_cluster	uncultured_bacterium
ASV_115	0.517241	0.00382244	Below	Bacteria	Proteobacteria	Gammaproteobacteria	Burkholderiales	Comamonadaceae	uncultured	uncultured_bacterium
ASV_118	0.482759	0.000436235	Above	Bacteria	Proteobacteria	Alphaproteobacteria	Rhizobiales	Rhizobiaceae	Allorhizobium-Neorhizobium-Pararhizobium-Rhizobium	Rhizobium_sp.
ASV_123	0.62069	0.00236429	Below	Bacteria	Actinobacteriota	Actinobacteria	Frankiales	Sporichthyaceae	Candidatus_Planktophila	uncultured_actinobacterium
ASV_124	0.724138	0.00250431	no	Bacteria	Proteobacteria	Alphaproteobacteria	Sphingomonadales	Sphingomonadaceae	Blastomonas	Blastomonas_natatoria
ASV_128	0.62069	0.000449699	Above	Bacteria	Proteobacteria	Alphaproteobacteria	Rhodospirillales	uncultured	uncultured	metagenome
ASV_129	0.344828	0.00356393	Below	Bacteria	Proteobacteria	Alphaproteobacteria	Acetobacterales	Acetobacteraceae	Roseomonas	uncultured_bacterium
ASV_132	0.413793	0.00286111	Below	Bacteria	Chloroflexi	Anaerolineae	RBG-13-54-9	RBG-13-54-9	RBG-13-54-9	uncultured_bacterium
ASV_133	0.896552	0.00250027	no	Bacteria	Proteobacteria	Gammaproteobacteria	Burkholderiales	Comamonadaceae	uncultured	uncultured_bacterium
ASV_136	0.586207	0.00250297	Below	Bacteria	Gemmatimonadota	Gemmatimonadetes	Gemmatimonadales	Gemmatimonadaceae	Gemmatimonas	uncultured_bacterium
ASV_137	0.310345	0.000698784	no	Bacteria	Proteobacteria	Alphaproteobacteria	Rhizobiales	Xanthobacteraceae	uncultured	metagenome
ASV_139	0.827586	0.00826827	Below	Bacteria	Bacteroidota	Bacteroidia	Chitinophagales	Chitinophagaceae	uncultured	uncultured_Bacteroidetes
ASV_144	0.37931	0.000169647	Above	Bacteria	Proteobacteria	Alphaproteobacteria	Rhodospirillales	uncultured	uncultured	uncultured_bacterium
ASV_146	0.965517	0.00680473	no	Bacteria	Proteobacteria	Gammaproteobacteria	Salinisphaerales	Solimonadaceae	Nevskia	uncultured_bacterium
ASV_147	0.448276	0.000367568	Above	Bacteria	Proteobacteria	Gammaproteobacteria	Burkholderiales	Comamonadaceae	Pelomonas	uncultured_bacterium
ASV_148	0.655172	0.00409442	Below	Bacteria	Proteobacteria	Gammaproteobacteria	Burkholderiales	Comamonadaceae	Rhodoferax	uncultured_beta
ASV_149	0.586207	0.00298767	Below	Bacteria	Actinobacteriota	Actinobacteria	Frankiales	Sporichthyaceae	hgcI_clade	uncultured_actinobacterium
ASV_151	0.62069	0.00316809	Below	Bacteria	Proteobacteria	Alphaproteobacteria	Caulobacterales	Hyphomonadaceae	Hirschia	metagenome
ASV_152	0.344828	0.00169378	Below	Bacteria	Proteobacteria	Alphaproteobacteria	Caulobacterales	Caulobacteraceae	Caulobacter	uncultured_bacterium
ASV_153	0.827586	0.00441351	Below	Bacteria	Bacteroidota	Bacteroidia	Sphingobacteriales	NS11-12_marine_group	NS11-12_marine_group	uncultured_Bacteroidetes
ASV_155	0.655172	0.00101788	no	Bacteria	Bacteroidota	Bacteroidia	Chitinophagales	Chitinophagaceae	Edaphobaculum	uncultured_bacterium
ASV_158	0.965517	0.0041927	no	Bacteria	Bacteroidota	Bacteroidia	Chitinophagales	Chitinophagaceae	Sediminibacterium	marine_metagenome
ASV_159	0.413793	0.000437581	no	Bacteria	Proteobacteria	Gammaproteobacteria	Xanthomonadales	Xanthomonadaceae	Pseudoxanthomonas	uncultured_Xanthomonadaceae
ASV_161	0.448276	0.0034818	Below	Bacteria	Bacteroidota	Bacteroidia	Cytophagales	Spirosomaceae	Lacihabitans	uncultured_bacterium
ASV_165	0.655172	0.0067226	Below	Bacteria	Proteobacteria	Alphaproteobacteria	Caulobacterales	Caulobacteraceae	Caulobacter	Caulobacter_fusiformis
ASV_172	0.482759	0.000477974	Above	Bacteria	Proteobacteria	Gammaproteobacteria	Burkholderiales	Comamonadaceae	Acidovorax	uncultured_bacterium
ASV_174	0.448276	0.00191593	Below	Bacteria	Bacteroidota	Bacteroidia	Flavobacteriales	Flavobacteriaceae	Flavobacterium	uncultured_bacterium
ASV_180	0.724138	0.00362048	Below	Bacteria	Planctomycetota	Planctomycetes	Planctomycetales	Schlesneriaceae	Schlesneria	uncultured_bacterium
ASV_186	0.586207	0.00288669	Below	Bacteria	Proteobacteria	Alphaproteobacteria	Rhizobiales	Xanthobacteraceae	Afipia	Afipia_broomeae
ASV_187	0.37931	0.000358144	no	Bacteria	Proteobacteria	Alphaproteobacteria	Rhizobiales	KF-JG30-B3	KF-JG30-B3	uncultured_Alphaproteobacteria
ASV_196	0.758621	0.0014972	no	Bacteria	Proteobacteria	Alphaproteobacteria	Micropepsales	Micropepsaceae	uncultured	metagenome
ASV_198	0.793103	0.00503286	Below	Bacteria	Bacteroidota	Bacteroidia	Sphingobacteriales	NS11-12_marine_group	NS11-12_marine_group	uncultured_bacterium
ASV_200	0.448276	0.000889973	no	Bacteria	Proteobacteria	Alphaproteobacteria	Caulobacterales	Caulobacteraceae	Caulobacter	uncultured_bacterium
ASV_203	0.517241	0.00242353	Below	Bacteria	Proteobacteria	Alphaproteobacteria	Rhizobiales	Beijerinckiaceae	Methylorosula	uncultured_bacterium
ASV_204	0.517241	0.00221349	Below	Bacteria	Proteobacteria	Gammaproteobacteria	Burkholderiales	Burkholderiaceae	Polynucleobacter	uncultured_bacterium
ASV_205	0.551724	0.00083881	no	Bacteria	Verrucomicrobiota	Verrucomicrobiae	Pedosphaerales	Pedosphaeraceae	Pedosphaeraceae	uncultured_bacterium
ASV_206	0.896552	0.00133294	Above	Bacteria	Proteobacteria	Gammaproteobacteria	Burkholderiales	Alcaligenaceae	GKS98_freshwater_group	uncultured_bacterium
ASV_211	0.37931	0.00264165	Below	Bacteria	Actinobacteriota	Actinobacteria	Frankiales	Sporichthyaceae	Candidatus_Planktophila	uncultured_bacterium
ASV_212	0.793103	0.00248008	no	Bacteria	Bacteroidota	Bacteroidia	Sphingobacteriales	NS11-12_marine_group	NS11-12_marine_group	uncultured_Bacteroidetes
ASV_213	0.413793	0.000768797	no	Bacteria	Proteobacteria	Gammaproteobacteria	Salinisphaerales	Solimonadaceae	Hydrocarboniphaga	Hydrocarboniphaga_daqingensis
ASV_214	0.551724	0.00152548	no	Bacteria	Verrucomicrobiota	Verrucomicrobiae	uncultured	uncultured	uncultured	uncultured_Verrucomicrobia
ASV_217	0.862069	0.00348315	no	Bacteria	Chloroflexi	Chloroflexia	Chloroflexales	Roseiflexaceae	uncultured	uncultured_Roseiflexus
ASV_220	0.931034	0.00183111	Above	Bacteria	Actinobacteriota	Thermoleophilia	Gaiellales	uncultured	uncultured	uncultured_bacterium
ASV_221	0.482759	0.000584339	no	Bacteria	Planctomycetota	Phycisphaerae	Phycisphaerales	Phycisphaeraceae	CL500-3	uncultured_Crater
ASV_222	0.551724	0.000740522	no	Bacteria	Bacteroidota	Bacteroidia	Cytophagales	Spirosomaceae	Pseudarcicella	uncultured_Arcicella
ASV_226	0.37931	0.000935751	no	Bacteria	Bacteroidota	Bacteroidia	Chitinophagales	Saprospiraceae	uncultured	uncultured_Devosia
ASV_228	0.344828	0.000424117	no	Bacteria	Bacteroidota	Bacteroidia	Cytophagales	Microscillaceae	uncultured	uncultured_bacterium
ASV_231	0.448276	0.00195363	Below	Bacteria	Bacteroidota	Bacteroidia	Chitinophagales	Chitinophagaceae	Ferruginibacter	uncultured_bacterium
ASV_233	0.896552	0.00248681	no	Bacteria	Proteobacteria	Gammaproteobacteria	Ga0077536	Ga0077536	Ga0077536	uncultured_bacterium
ASV_236	0.551724	0.00248277	Below	Bacteria	Proteobacteria	Alphaproteobacteria	Caulobacterales	Hyphomonadaceae	Hirschia	uncultured_bacterium
ASV_238	0.758621	0.00175571	no	Bacteria	Proteobacteria	Gammaproteobacteria	Burkholderiales	TRA3-20	TRA3-20	uncultured_bacterium
ASV_245	0.310345	0.000689359	no	Bacteria	Planctomycetota	Planctomycetes	Gemmatales	Gemmataceae	Gemmata	metagenome
ASV_246	0.758621	0.00235621	no	Bacteria	Planctomycetota	Planctomycetes	Gemmatales	Gemmataceae	uncultured	uncultured_bacterium
ASV_250	0.517241	0.00113906	no	Bacteria	Verrucomicrobiota	Verrucomicrobiae	Opitutales	Opitutaceae	Opitutus	metagenome
ASV_251	0.517241	0.000753986	no	Bacteria	Proteobacteria	Gammaproteobacteria	Burkholderiales	Nitrosomonadaceae	GOUTA6	metagenome
ASV_252	0.551724	0.00234948	Below	Bacteria	Actinobacteriota	Actinobacteria	Frankiales	Sporichthyaceae	hgcI_clade	uncultured_bacterium
ASV_259	0.517241	0.000623385	no	Bacteria	Proteobacteria	Alphaproteobacteria	Rhizobiales	Rhizobiaceae	Allorhizobium-Neorhizobium-Pararhizobium-Rhizobium	metagenome
ASV_260	0.758621	0.00109597	Above	Bacteria	Proteobacteria	Gammaproteobacteria	Burkholderiales	Comamonadaceae	Polaromonas	uncultured_bacterium
ASV_263	0.827586	0.00206	no	Bacteria	Bacteroidota	Bacteroidia	Chitinophagales	Chitinophagaceae	Sediminibacterium	uncultured_bacterium
ASV_266	0.724138	0.00228754	no	Bacteria	Actinobacteriota	Actinobacteria	Frankiales	Sporichthyaceae	hgcI_clade	uncultured_Actinomycetales
ASV_270	0.551724	0.000593764	Above	Bacteria	Proteobacteria	Alphaproteobacteria	Rhizobiales	KF-JG30-B3	KF-JG30-B3	metagenome
ASV_271	0.344828	0.00265511	Below	Bacteria	Verrucomicrobiota	Verrucomicrobiae	Verrucomicrobiales	Rubritaleaceae	Luteolibacter	uncultured_bacterium
ASV_272	0.413793	0.000798418	no	Bacteria	Proteobacteria	Gammaproteobacteria	Burkholderiales	Nitrosomonadaceae	GOUTA6	metagenome
ASV_273	0.827586	0.00257702	no	Bacteria	Proteobacteria	Alphaproteobacteria	Acetobacterales	Acetobacteraceae	uncultured	uncultured_bacterium
ASV_276	0.241379	0.000270627	no	Bacteria	Proteobacteria	Gammaproteobacteria	Salinisphaerales	Solimonadaceae	Alkanibacter	gamma_proteobacterium
ASV_280	0.310345	0.00316674	Below	Bacteria	Bacteroidota	Bacteroidia	Chitinophagales	Saprospiraceae	uncultured	uncultured_bacterium
ASV_282	0.62069	0.0028086	Below	Bacteria	Proteobacteria	Alphaproteobacteria	Rhizobiales	Devosiaceae	Devosia	uncultured_bacterium
ASV_283	0.482759	0.000238314	Above	Bacteria	Proteobacteria	Gammaproteobacteria	Pseudomonadales	Moraxellaceae	Acinetobacter	Acinetobacter_sp.
ASV_285	0.758621	0.00278571	no	Bacteria	Proteobacteria	Alphaproteobacteria	Reyranellales	Reyranellaceae	Reyranella	uncultured_bacterium
ASV_289	0.37931	0.00178668	Below	Bacteria	Proteobacteria	Gammaproteobacteria	Burkholderiales	Comamonadaceae	Rhizobacter	uncultured_Burkholderiales
ASV_295	0.724138	0.00104885	Above	Bacteria	Proteobacteria	Gammaproteobacteria	Burkholderiales	Alcaligenaceae	GKS98_freshwater_group	uncultured_bacterium
ASV_298	0.448276	0.000636849	no	Bacteria	Verrucomicrobiota	Verrucomicrobiae	Pedosphaerales	Pedosphaeraceae	uncultured	uncultured_bacterium
ASV_300	0.275862	0.000231582	no	Bacteria	Proteobacteria	Alphaproteobacteria	Rhizobiales	Xanthobacteraceae	Pseudorhodoplanes	uncultured_bacterium
ASV_302	0.517241	0.000371608	Above	Bacteria	Proteobacteria	Gammaproteobacteria	Burkholderiales	Burkholderiaceae	Polynucleobacter	uncultured_bacterium
ASV_303	0.448276	0.00103404	no	Bacteria	Verrucomicrobiota	Verrucomicrobiae	Opitutales	Opitutaceae	Opitutus	uncultured_bacterium
ASV_307	0.482759	0.000228889	Above	Bacteria	Proteobacteria	Alphaproteobacteria	Micavibrionales	uncultured	uncultured	uncultured_sludge
ASV_310	0.655172	0.00308327	Below	Bacteria	Bacteroidota	Bacteroidia	Chitinophagales	Chitinophagaceae	Edaphobaculum	uncultured_Bacteroidetes
ASV_311	0.62069	0.00101923	no	Bacteria	Bacteroidota	Bacteroidia	Cytophagales	Spirosomaceae	Pseudarcicella	uncultured_bacterium
ASV_315	0.275862	0.00136795	Below	Bacteria	Bacteroidota	Bacteroidia	Flavobacteriales	Flavobacteriaceae	Flavobacterium	uncultured_Flavobacterium
ASV_320	0.275862	0.000409307	no	Bacteria	Acidobacteriota	Vicinamibacteria	Vicinamibacterales	Vicinamibacteraceae	Vicinamibacteraceae	uncultured_Acidobacteria
ASV_322	0.793103	0.000556065	Above	Bacteria	Proteobacteria	Alphaproteobacteria	Paracaedibacterales	Paracaedibacteraceae	uncultured	uncultured_bacterium
ASV_324	0.517241	0.00179476	Below	Bacteria	Planctomycetota	vadinHA49	vadinHA49	vadinHA49	vadinHA49	uncultured_bacterium
ASV_326	0.344828	0.00106366	Below	Bacteria	Proteobacteria	Alphaproteobacteria	Reyranellales	Reyranellaceae	Reyranella	metagenome
ASV_330	0.793103	0.000766104	Above	Bacteria	Bacteroidota	Bacteroidia	Sphingobacteriales	NS11-12_marine_group	NS11-12_marine_group	uncultured_bacterium
ASV_331	0.931034	0.00208019	Above	Bacteria	Planctomycetota	Planctomycetes	Gemmatales	Gemmataceae	uncultured	uncultured_Crater
ASV_333	0.448276	0.000753986	no	Bacteria	Planctomycetota	vadinHA49	vadinHA49	vadinHA49	vadinHA49	uncultured_bacterium
ASV_335	0.344828	0.000863045	no	Bacteria	Proteobacteria	Alphaproteobacteria	Reyranellales	Reyranellaceae	Reyranella	metagenome
ASV_339	0.586207	0.00131678	no	Bacteria	Bacteroidota	Bacteroidia	Cytophagales	Microscillaceae	uncultured	uncultured_bacterium
ASV_340	0.862069	0.00128716	Above	Bacteria	Bacteroidota	Bacteroidia	Chitinophagales	Chitinophagaceae	Sediminibacterium	uncultured_bacterium
ASV_347	0.689655	0.000877856	Above	Bacteria	Proteobacteria	Alphaproteobacteria	Micropepsales	Micropepsaceae	uncultured	uncultured_bacterium
ASV_349	0.37931	0.000787646	no	Bacteria	Proteobacteria	Gammaproteobacteria	Burkholderiales	Comamonadaceae	Variovorax	Variovorax_sp.
ASV_351	0.344828	0.00296074	Below	Bacteria	Bacteroidota	Bacteroidia	Flavobacteriales	Crocinitomicaceae	Fluviicola	uncultured_Fluviicola
ASV_353	0.37931	0.000289477	Above	Bacteria	Verrucomicrobiota	Verrucomicrobiae	Opitutales	Opitutaceae	Opitutus	uncultured_bacterium
ASV_354	0.310345	0.000157529	Above	Bacteria	Nitrospirota	Nitrospiria	Nitrospirales	Nitrospiraceae	Nitrospira	uncultured_bacterium
ASV_362	0.862069	0.00168839	Above	Bacteria	Proteobacteria	Gammaproteobacteria	Oceanospirillales	Pseudohongiellaceae	BIyi10	metagenome
ASV_364	0.344828	0.000473934	no	Bacteria	Proteobacteria	Alphaproteobacteria	Rhizobiales	Xanthobacteraceae	Bradyrhizobium	uncultured_bacterium
ASV_365	0.344828	0.00107443	Below	Bacteria	Proteobacteria	Gammaproteobacteria	Legionellales	Legionellaceae	Legionella	uncultured_bacterium
ASV_366	0.482759	0.00110001	no	Bacteria	Desulfobacterota	Desulfuromonadia	PB19	PB19	PB19	uncultured_bacterium
ASV_371	0.37931	0.000655699	no	Bacteria	Bacteroidota	Bacteroidia	Flavobacteriales	NS9_marine_group	NS9_marine_group	metagenome
ASV_373	0.655172	0.00216098	no	Bacteria	Verrucomicrobiota	Verrucomicrobiae	Pedosphaerales	Pedosphaeraceae	SH3-11	uncultured_bacterium
ASV_382	0.344828	0.000448353	no	Bacteria	Bacteroidota	Bacteroidia	Sphingobacteriales	Sphingobacteriaceae	uncultured	metagenome
ASV_384	0.310345	0.000111752	Above	Bacteria	Proteobacteria	Gammaproteobacteria	Burkholderiales	Methylophilaceae	uncultured	metagenome
ASV_386	0.413793	0.000204653	Above	Bacteria	Proteobacteria	Alphaproteobacteria	Rhizobiales	Xanthobacteraceae	Pseudorhodoplanes	uncultured_bacterium
ASV_391	0.37931	0.000278706	Above	Bacteria	Planctomycetota	Phycisphaerae	Phycisphaerales	Phycisphaeraceae	CL500-3	uncultured_bacterium
ASV_396	0.517241	0.00113367	no	Bacteria	Verrucomicrobiota	Verrucomicrobiae	Verrucomicrobiales	Verrucomicrobiaceae	Prosthecobacter	uncultured_bacterium
ASV_404	0.862069	0.000985568	Above	Bacteria	Proteobacteria	Gammaproteobacteria	Burkholderiales	B1-7BS	B1-7BS	uncultured_bacterium
ASV_411	0.37931	0.00100711	no	Bacteria	Proteobacteria	Gammaproteobacteria	Salinisphaerales	Solimonadaceae	uncultured	uncultured_bacterium
ASV_419	0.275862	0.000216771	no	Bacteria	Acidobacteriota	Vicinamibacteria	Vicinamibacterales	Vicinamibacteraceae	Vicinamibacteraceae	uncultured_Acidobacteria
ASV_421	0.551724	0.000500862	Above	Bacteria	Verrucomicrobiota	Verrucomicrobiae	Pedosphaerales	Pedosphaeraceae	Pedosphaeraceae	metagenome
ASV_428	0.655172	0.000620692	Above	Bacteria	Acidobacteriota	Vicinamibacteria	Vicinamibacterales	Vicinamibacteraceae	Vicinamibacteraceae	uncultured_Acidobacteria
ASV_429	0.586207	0.000735137	no	Bacteria	Proteobacteria	Alphaproteobacteria	Rhizobiales	A0839	A0839	uncultured_bacterium
ASV_432	0.517241	0.000552026	Above	Bacteria	Proteobacteria	Gammaproteobacteria	Burkholderiales	Rhodocyclaceae	Sulfuritalea	uncultured_bacterium
ASV_435	0.586207	0.00158068	no	Bacteria	Verrucomicrobiota	Verrucomicrobiae	Pedosphaerales	Pedosphaeraceae	SH3-11	uncultured_bacterium
ASV_436	0.448276	0.000499516	no	Bacteria	Bacteroidota	Bacteroidia	Chitinophagales	Saprospiraceae	uncultured	uncultured_bacterium
ASV_437	0.551724	0.000278706	Above	Bacteria	Proteobacteria	Gammaproteobacteria	R7C24	R7C24	R7C24	metagenome
ASV_439	0.586207	0.00113098	no	Bacteria	Desulfobacterota	Desulfuromonadia	Bradymonadales	Bradymonadales	Bradymonadales	uncultured_bacterium
ASV_440	0.310345	0.0012535	Below	Bacteria	Bacteroidota	Bacteroidia	Sphingobacteriales	AKYH767	AKYH767	uncultured_bacterium
ASV_445	0.275862	0.000103673	Above	Bacteria	Chloroflexi	Anaerolineae	Anaerolineales	Anaerolineaceae	uncultured	uncultured_bacterium
ASV_446	0.689655	0.00128178	no	Bacteria	Bacteroidota	Bacteroidia	Cytophagales	Cyclobacteriaceae	Algoriphagus	uncultured_bacterium
ASV_449	0.448276	0.000503555	no	Bacteria	Proteobacteria	Gammaproteobacteria	Steroidobacterales	Steroidobacteraceae	uncultured	uncultured_bacterium
ASV_453	0.344828	0.000554719	no	Bacteria	Desulfobacterota	uncultured	uncultured	uncultured	uncultured	uncultured_bacterium
ASV_456	0.37931	0.000951908	no	Bacteria	Bacteroidota	Bacteroidia	Chitinophagales	Chitinophagaceae	Dinghuibacter	uncultured_bacterium
ASV_464	0.344828	0.000207346	Above	Bacteria	Bdellovibrionota	Oligoflexia	053A03-B-DI-P58	053A03-B-DI-P58	053A03-B-DI-P58	uncultured_delta
ASV_478	0.241379	4.71241478944257e-05	Above	Bacteria	Proteobacteria	Alphaproteobacteria	Elsterales	uncultured	uncultured	uncultured_bacterium
ASV_480	0.275862	0.000552026	no	Bacteria	Verrucomicrobiota	Verrucomicrobiae	Opitutales	Opitutaceae	Opitutus	metagenome
ASV_484	0.37931	0.00112425	Below	Bacteria	Proteobacteria	Gammaproteobacteria	Burkholderiales	Comamonadaceae	Pelomonas	uncultured_bacterium
ASV_489	0.344828	0.000496823	no	Bacteria	Proteobacteria	Alphaproteobacteria	Reyranellales	Reyranellaceae	Reyranella	uncultured_bacterium
ASV_495	0.62069	0.000834771	no	Bacteria	Proteobacteria	Alphaproteobacteria	Rhizobiales	Beijerinckiaceae	alphaI_cluster	metagenome
ASV_498	0.551724	0.00166012	no	Bacteria	Chloroflexi	Chloroflexia	Chloroflexales	Roseiflexaceae	uncultured	uncultured_bacterium
ASV_501	0.275862	0.000662431	no	Bacteria	Proteobacteria	Gammaproteobacteria	Burkholderiales	Comamonadaceae	uncultured	uncultured_bacterium
ASV_505	0.172414	0.00288534	Below	Bacteria	Proteobacteria	Gammaproteobacteria	Burkholderiales	Comamonadaceae	Rhodoferax	uncultured_bacterium
ASV_528	0.37931	0.000387764	no	Bacteria	Proteobacteria	Gammaproteobacteria	Burkholderiales	Sutterellaceae	AAP99	Derxia_sp.
ASV_535	0.517241	0.00153759	no	Bacteria	Proteobacteria	Alphaproteobacteria	Reyranellales	Reyranellaceae	Reyranella	metagenome
ASV_536	0.37931	0.000612614	no	Bacteria	Proteobacteria	Alphaproteobacteria	Acetobacterales	Acetobacteraceae	uncultured	uncultured_bacterium
ASV_537	0.655172	0.000367568	Above	Bacteria	Proteobacteria	Alphaproteobacteria	Reyranellales	Reyranellaceae	Reyranella	uncultured_bacterium
ASV_541	0.586207	0.00128312	no	Bacteria	Myxococcota	Myxococcia	Myxococcales	Myxococcaceae	P3OB-42	uncultured_delta
ASV_545	0.448276	0.000708209	no	Bacteria	Actinobacteriota	Actinobacteria	Corynebacteriales	Nocardiaceae	Rhodococcus	Rhodococcus_sp.
ASV_546	0.413793	0.000836117	no	Bacteria	Armatimonadota	Armatimonadia	Armatimonadales	Armatimonadaceae	Armatimonas	uncultured_beta
ASV_548	0.62069	0.000797071	Above	Bacteria	Verrucomicrobiota	Verrucomicrobiae	Opitutales	Opitutaceae	Opitutus	metagenome
ASV_553	0.310345	0.00025851	no	Bacteria	Proteobacteria	Gammaproteobacteria	Burkholderiales	Comamonadaceae	Leptothrix	uncultured_bacterium
ASV_554	0.448276	0.000631464	no	Bacteria	Verrucomicrobiota	Verrucomicrobiae	Chthoniobacterales	Chthoniobacteraceae	Chthoniobacter	uncultured_bacterium
ASV_561	0.448276	0.00136525	Below	Bacteria	Bacteroidota	Bacteroidia	Flavobacteriales	Flavobacteriaceae	Flavobacterium	uncultured_Bacteroidetes
ASV_562	0.344828	0.000783607	no	Bacteria	Planctomycetota	Planctomycetes	Gemmatales	Gemmataceae	Gemmata	uncultured_bacterium
ASV_563	0.689655	0.0005803	Above	Bacteria	Proteobacteria	Gammaproteobacteria	Burkholderiales	Oxalobacteraceae	uncultured	uncultured_bacterium
ASV_568	0.310345	0.000180418	Above	Bacteria	Proteobacteria	Gammaproteobacteria	Burkholderiales	Hydrogenophilaceae	uncultured	uncultured_bacterium
ASV_571	0.551724	0.000790339	no	Bacteria	Proteobacteria	Gammaproteobacteria	Burkholderiales	Rhodocyclaceae	Sulfuritalea	uncultured_bacterium
ASV_572	0.37931	0.000766104	no	Bacteria	Bacteroidota	Bacteroidia	Chitinophagales	37-13	37-13	metagenome
ASV_577	0.482759	0.00135179	no	Bacteria	Proteobacteria	Alphaproteobacteria	Sphingomonadales	Sphingomonadaceae	uncultured	uncultured_bacterium
ASV_581	0.310345	0.000876509	no	Bacteria	Proteobacteria	Gammaproteobacteria	Salinisphaerales	Solimonadaceae	Nevskia	Nevskia_ramosa
ASV_584	0.37931	0.000309673	Above	Bacteria	Bacteroidota	Bacteroidia	Flavobacteriales	Flavobacteriaceae	Flavobacterium	uncultured_bacterium
ASV_591	0.344828	7.00130197288611e-05	Above	Bacteria	Proteobacteria	Gammaproteobacteria	Burkholderiales	Comamonadaceae	uncultured	metagenome
ASV_594	0.310345	0.00136256	Below	Bacteria	Bacteroidota	Bacteroidia	Chitinophagales	Chitinophagaceae	Edaphobaculum	metagenome
ASV_597	0.62069	0.00104616	no	Bacteria	Proteobacteria	Alphaproteobacteria	Rhizobiales	Beijerinckiaceae	alphaI_cluster	uncultured_Alphaproteobacteria
ASV_599	0.448276	0.00046047	no	Bacteria	Bacteroidota	Bacteroidia	Flavobacteriales	NS9_marine_group	NS9_marine_group	uncultured_bacterium
ASV_602	0.413793	0.000907476	no	Bacteria	Proteobacteria	Alphaproteobacteria	Sphingomonadales	Sphingomonadaceae	Sphingopyxis	uncultured_bacterium
ASV_604	0.62069	0.000578954	Above	Bacteria	Chloroflexi	SL56_marine_group	SL56_marine_group	SL56_marine_group	SL56_marine_group	marine_metagenome
ASV_605	0.37931	0.00073379	no	Bacteria	Verrucomicrobiota	Verrucomicrobiae	Opitutales	Opitutaceae	Lacunisphaera	uncultured_proteobacterium
ASV_609	0.206897	0.000117137	no	Bacteria	Proteobacteria	Gammaproteobacteria	Oceanospirillales	Pseudohongiellaceae	BIyi10	metagenome
ASV_614	0.448276	0.000618	no	Bacteria	Planctomycetota	Planctomycetes	Planctomycetales	Schlesneriaceae	Schlesneria	uncultured_bacterium
ASV_620	0.482759	0.000276013	Above	Bacteria	Acidobacteriota	Vicinamibacteria	Vicinamibacterales	uncultured	uncultured	uncultured_bacterium
ASV_626	0.448276	0.000222157	Above	Bacteria	Bacteroidota	Bacteroidia	Cytophagales	Spirosomaceae	Lacihabitans	Lacihabitans_sp.
ASV_627	0.344828	0.00101788	Below	Bacteria	SAR324_clade(Marine_group_B)	SAR324_clade(Marine_group_B)	SAR324_clade(Marine_group_B)	SAR324_clade(Marine_group_B)	SAR324_clade(Marine_group_B)	uncultured_bacterium
ASV_637	0.37931	0.000600496	no	Bacteria	Proteobacteria	Gammaproteobacteria	Legionellales	Legionellaceae	Legionella	uncultured_bacterium
ASV_641	0.448276	0.000604535	no	Bacteria	Proteobacteria	Alphaproteobacteria	Rhodobacterales	Rhodobacteraceae	Pseudorhodobacter	uncultured_bacterium
ASV_650	0.37931	0.000418732	no	Bacteria	Latescibacterota	Latescibacterota	Latescibacterota	Latescibacterota	Latescibacterota	uncultured_Latescibacteria
ASV_656	0.37931	0.000705516	no	Bacteria	Proteobacteria	Gammaproteobacteria	Steroidobacterales	Steroidobacteraceae	uncultured	uncultured_bacterium
ASV_669	0.551724	0.000416039	Above	Bacteria	Proteobacteria	Alphaproteobacteria	Rhodospirillales	uncultured	uncultured	uncultured_bacterium
ASV_673	0.344828	0.000166954	Above	Bacteria	Proteobacteria	Gammaproteobacteria	CCD24	CCD24	CCD24	metagenome
ASV_684	0.448276	0.000390457	Above	Bacteria	Proteobacteria	Alphaproteobacteria	Caulobacterales	Caulobacteraceae	uncultured	uncultured_bacterium
ASV_685	0.586207	0.000657045	Above	Bacteria	Proteobacteria	Gammaproteobacteria	Steroidobacterales	Steroidobacteraceae	uncultured	uncultured_bacterium
ASV_690	0.413793	0.000284091	Above	Bacteria	Bacteroidota	Bacteroidia	Flavobacteriales	Crocinitomicaceae	Fluviicola	uncultured_bacterium
ASV_691	0.551724	0.000328523	Above	Bacteria	Proteobacteria	Gammaproteobacteria	Burkholderiales	Sutterellaceae	AAP99	uncultured_bacterium
ASV_698	0.344828	0.000131948	Above	Bacteria	Proteobacteria	Alphaproteobacteria	Rhizobiales	Xanthobacteraceae	Bradyrhizobium	Bradyrhizobium_sp.
ASV_702	0.37931	0.000561451	no	Bacteria	Proteobacteria	Gammaproteobacteria	Legionellales	Legionellaceae	Legionella	uncultured_bacterium
ASV_703	0.448276	0.000425464	Above	Bacteria	Planctomycetota	Planctomycetes	Planctomycetales	uncultured	uncultured	uncultured_bacterium
ASV_704	0.862069	0.00127774	Above	Bacteria	Bacteroidota	Bacteroidia	Chitinophagales	Chitinophagaceae	Edaphobaculum	metagenome
ASV_705	0.413793	0.000592418	no	Bacteria	Actinobacteriota	Acidimicrobiia	Microtrichales	Ilumatobacteraceae	CL500-29_marine_group	uncultured_bacterium
ASV_710	0.344828	0.000328523	no	Bacteria	Proteobacteria	Alphaproteobacteria	Rhizobiales	Xanthobacteraceae	Afipia	Afipia_sp.
ASV_714	0.344828	0.000223503	Above	Bacteria	Planctomycetota	Phycisphaerae	Phycisphaerales	Phycisphaeraceae	SM1A02	metagenome
ASV_744	0.37931	0.000347372	no	Bacteria	Acidobacteriota	Vicinamibacteria	Vicinamibacterales	Vicinamibacteraceae	Vicinamibacteraceae	uncultured_Acidobacteria
ASV_750	0.37931	0.00125081	Below	Bacteria	Proteobacteria	Alphaproteobacteria	Sphingomonadales	Sphingomonadaceae	Novosphingobium	alpha_proteobacterium
ASV_751	0.137931	6.1934594375531e-05	no	Bacteria	Bacteroidota	Bacteroidia	Sphingobacteriales	Sphingobacteriaceae	Mucilaginibacter	uncultured_bacterium
ASV_754	0.551724	0.000640888	no	Bacteria	Chloroflexi	Anaerolineae	RBG-13-54-9	RBG-13-54-9	RBG-13-54-9	metagenome
ASV_768	0.37931	0.000386418	no	Bacteria	SAR324_clade(Marine_group_B)	SAR324_clade(Marine_group_B)	SAR324_clade(Marine_group_B)	SAR324_clade(Marine_group_B)	SAR324_clade(Marine_group_B)	uncultured_bacterium
ASV_770	0.310345	0.000208693	Above	Bacteria	Actinobacteriota	Actinobacteria	Corynebacteriales	Mycobacteriaceae	Mycobacterium	uncultured_bacterium
ASV_772	0.275862	0.000708209	no	Bacteria	Bdellovibrionota	Bdellovibrionia	Bdellovibrionales	Bdellovibrionaceae	OM27_clade	metagenome
ASV_779	0.62069	0.000552026	Above	Bacteria	Planctomycetota	Phycisphaerae	Phycisphaerales	Phycisphaeraceae	CL500-3	uncultured_bacterium
ASV_781	0.37931	0.000778222	no	Bacteria	Bacteroidota	Bacteroidia	Flavobacteriales	Crocinitomicaceae	Fluviicola	uncultured_Fluviicola
ASV_784	0.275862	0.000191189	no	Bacteria	Proteobacteria	Alphaproteobacteria	Reyranellales	Reyranellaceae	Reyranella	uncultured_bacterium
ASV_787	0.689655	0.000554719	Above	Bacteria	Planctomycetota	Planctomycetes	Planctomycetales	Rubinisphaeraceae	SH-PL14	uncultured_bacterium
ASV_796	0.275862	0.000130601	Above	Bacteria	Proteobacteria	Gammaproteobacteria	Gammaproteobacteria_Incertae_Sedis	Unknown_Family	uncultured	uncultured_bacterium
ASV_838	0.37931	0.000495477	no	Bacteria	Bacteroidota	Bacteroidia	Sphingobacteriales	NS11-12_marine_group	NS11-12_marine_group	uncultured_bacterium
ASV_853	0.275862	0.000597803	no	Bacteria	Verrucomicrobiota	Verrucomicrobiae	uncultured	uncultured	uncultured	uncultured_bacterium
ASV_859	0.517241	0.000235621	Above	Bacteria	Actinobacteriota	Actinobacteria	Frankiales	Sporichthyaceae	hgcI_clade	uncultured_bacterium
ASV_869	0.689655	0.00073379	Above	Bacteria	Bacteroidota	Bacteroidia	Sphingobacteriales	ST-12K33	ST-12K33	uncultured_Sphingobacteriia
ASV_875	0.241379	0.000507594	no	Bacteria	Proteobacteria	Alphaproteobacteria	Rhizobiales	Beijerinckiaceae	alphaI_cluster	uncultured_bacterium
ASV_884	0.413793	0.00027332	Above	Bacteria	Proteobacteria	Gammaproteobacteria	R7C24	R7C24	R7C24	uncultured_soil
ASV_888	0.413793	0.000316405	Above	Bacteria	Bacteroidota	Bacteroidia	Flavobacteriales	Flavobacteriaceae	Flavobacterium	uncultured_bacterium
ASV_892	0.37931	0.000141372	Above	Bacteria	Patescibacteria	Parcubacteria	Parcubacteria	Parcubacteria	Parcubacteria	uncultured_bacterium
ASV_896	0.344828	0.000696091	no	Bacteria	Fibrobacterota	Fibrobacteria	Fibrobacterales	Fibrobacteraceae	uncultured	uncultured_bacterium
ASV_897	0.655172	0.000539908	Above	Bacteria	Chloroflexi	TK10	TK10	TK10	TK10	uncultured_bacterium
ASV_898	0.310345	0.00115925	Below	Bacteria	Bacteroidota	Bacteroidia	Chitinophagales	Chitinophagaceae	Edaphobaculum	uncultured_Bacteroides
ASV_909	0.344828	0.000484706	no	Bacteria	Proteobacteria	Gammaproteobacteria	Burkholderiales	Comamonadaceae	Rubrivivax	uncultured_bacterium
ASV_918	0.310345	0.000607228	no	Bacteria	Proteobacteria	Gammaproteobacteria	Burkholderiales	Comamonadaceae	Leptothrix	uncultured_bacterium
ASV_924	0.448276	0.000475281	no	Bacteria	Acidobacteriota	Vicinamibacteria	Subgroup_17	Subgroup_17	Subgroup_17	uncultured_soil
ASV_939	0.551724	5.38561690222009e-05	Above	Bacteria	Proteobacteria	Gammaproteobacteria	Burkholderiales	Comamonadaceae	Limnohabitans	uncultured_bacterium
ASV_951	0.482759	0.000232928	Above	Bacteria	Proteobacteria	Gammaproteobacteria	Burkholderiales	TRA3-20	TRA3-20	uncultured_bacterium
ASV_958	0.241379	0.000242353	no	Bacteria	Verrucomicrobiota	Verrucomicrobiae	Opitutales	Opitutaceae	Lacunisphaera	uncultured_Opitutus
ASV_965	0.344828	0.000447006	no	Bacteria	Planctomycetota	OM190	OM190	OM190	OM190	uncultured_bacterium
ASV_967	0.344828	0.000603189	no	Bacteria	Proteobacteria	Gammaproteobacteria	Burkholderiales	Comamonadaceae	uncultured	uncultured_bacterium
ASV_968	0.344828	0.000840156	no	Bacteria	Bacteroidota	Bacteroidia	Sphingobacteriales	LiUU-11-161	LiUU-11-161	uncultured_bacterium
ASV_973	0.551724	0.000491438	Above	Bacteria	Proteobacteria	Gammaproteobacteria	Burkholderiales	Oxalobacteraceae	uncultured	uncultured_bacterium
ASV_977	0.413793	0.000892666	no	Bacteria	Proteobacteria	Gammaproteobacteria	Burkholderiales	Rhodocyclaceae	Sulfuritalea	uncultured_bacterium
ASV_981	0.344828	0.000135987	Above	Bacteria	Planctomycetota	Planctomycetes	Pirellulales	Pirellulaceae	Pirellula	uncultured_bacterium
ASV_999	0.310345	0.000257163	no	Bacteria	Planctomycetota	Planctomycetes	Planctomycetales	uncultured	uncultured	uncultured_planctomycete
ASV_1004	0.310345	0.000183111	Above	Bacteria	Acidobacteriota	Blastocatellia	45597	45597	45597	uncultured_bacterium
ASV_1008	0.517241	0.000646274	no	Bacteria	Armatimonadota	Armatimonadia	Armatimonadales	Armatimonadaceae	Armatimonas	uncultured_bacterium
ASV_1011	0.655172	0.000556065	Above	Bacteria	Bdellovibrionota	Oligoflexia	Oligoflexales	uncultured	uncultured	uncultured_bacterium
ASV_1024	0.344828	0.000414693	no	Bacteria	Proteobacteria	Gammaproteobacteria	CHAB-XI-27	CHAB-XI-27	CHAB-XI-27	uncultured_bacterium
ASV_1027	0.344828	0.000281398	no	Bacteria	Proteobacteria	Alphaproteobacteria	Caulobacterales	Caulobacteraceae	uncultured	uncultured_Caulobacter
ASV_1037	0.551724	0.000488745	Above	Bacteria	Actinobacteriota	Acidimicrobiia	Microtrichales	Ilumatobacteraceae	CL500-29_marine_group	uncultured_bacterium
ASV_1040	0.37931	0.000381032	no	Bacteria	Proteobacteria	Gammaproteobacteria	Legionellales	Legionellaceae	Legionella	uncultured_bacterium
ASV_1043	0.413793	0.000500862	no	Bacteria	Bdellovibrionota	Oligoflexia	Oligoflexales	uncultured	uncultured	uncultured_bacterium
ASV_1054	0.586207	0.000486052	Above	Bacteria	Bacteroidota	Bacteroidia	Sphingobacteriales	Sphingobacteriaceae	Pedobacter	uncultured_bacterium
ASV_1067	0.37931	0.000475281	no	Bacteria	Planctomycetota	OM190	OM190	OM190	OM190	uncultured_bacterium
ASV_1074	0.413793	0.00027332	Above	Bacteria	Planctomycetota	vadinHA49	vadinHA49	vadinHA49	vadinHA49	uncultured_bacterium
ASV_1093	0.517241	0.000511634	Above	Bacteria	Planctomycetota	Planctomycetes	Pirellulales	Pirellulaceae	uncultured	metagenome
ASV_1102	0.37931	0.000463163	no	Bacteria	Bacteroidota	Bacteroidia	Chitinophagales	Chitinophagaceae	Edaphobaculum	uncultured_bacterium
ASV_1105	0.413793	0.000675895	no	Bacteria	Proteobacteria	Gammaproteobacteria	Burkholderiales	Comamonadaceae	Methylibium	uncultured_bacterium
ASV_1108	0.482759	0.000135987	Above	Bacteria	Chloroflexi	SL56_marine_group	SL56_marine_group	SL56_marine_group	SL56_marine_group	uncultured_bacterium
ASV_1114	0.103448	0.000379686	Below	Bacteria	Proteobacteria	Gammaproteobacteria	Legionellales	Legionellaceae	Legionella	uncultured_bacterium
ASV_1119	0.344828	0.000753986	no	Bacteria	Proteobacteria	Gammaproteobacteria	Salinisphaerales	Solimonadaceae	Nevskia	Nevskia_ramosa
ASV_1127	0.448276	0.000234274	Above	Bacteria	Myxococcota	Myxococcia	Myxococcales	Myxococcaceae	P3OB-42	uncultured_delta
ASV_1134	0.482759	9.96339126910716e-05	Above	Bacteria	Spirochaetota	Spirochaetia	Spirochaetales	Spirochaetaceae	Spirochaeta_2	Spirochaeta_sp.
ASV_1137	0.413793	0.000208693	Above	Bacteria	Proteobacteria	Alphaproteobacteria	Rhizobiales	Xanthobacteraceae	uncultured	uncultured_bacterium
ASV_1162	0.448276	0.000175033	Above	Bacteria	Actinobacteriota	Thermoleophilia	Gaiellales	uncultured	uncultured	uncultured_actinobacterium
ASV_1185	0.517241	0.00025447	Above	Bacteria	Proteobacteria	Alphaproteobacteria	Rhodospirillales	Magnetospiraceae	uncultured	metagenome
ASV_1188	0.275862	0.000234274	no	Bacteria	Bacteroidota	Bacteroidia	Chitinophagales	Chitinophagaceae	Terrimonas	uncultured_bacterium
ASV_1189	0.310345	0.000324483	no	Bacteria	Bacteroidota	Bacteroidia	Flavobacteriales	Flavobacteriaceae	Flavobacterium	uncultured_Bacteroidetes
ASV_1190	0.758621	0.000360836	Above	Bacteria	Proteobacteria	Alphaproteobacteria	Rickettsiales	Rickettsiaceae	uncultured	uncultured_bacterium
ASV_1198	0.413793	0.000362183	Above	Bacteria	Proteobacteria	Gammaproteobacteria	211ds20	211ds20	211ds20	uncultured_bacterium
ASV_1208	0.275862	0.000114444	Above	Bacteria	Proteobacteria	Gammaproteobacteria	Burkholderiales	Methylophilaceae	uncultured	uncultured_bacterium
ASV_1226	0.413793	0.000550679	no	Bacteria	Proteobacteria	Alphaproteobacteria	Caulobacterales	Caulobacteraceae	Brevundimonas	Brevundimonas_sp.
ASV_1250	0.517241	0.000355451	Above	Bacteria	Bdellovibrionota	Oligoflexia	0319-6G20	0319-6G20	0319-6G20	uncultured_soil
ASV_1264	0.482759	7.80914450821912e-05	Above	Bacteria	Proteobacteria	Alphaproteobacteria	Rhizobiales	Xanthobacteraceae	Rhodoplanes	uncultured_bacterium
ASV_1286	0.275862	9.29018915632965e-05	Above	Bacteria	Planctomycetota	Planctomycetes	Pirellulales	Pirellulaceae	Pirellula	uncultured_bacterium
ASV_1288	0.448276	0.000499516	no	Bacteria	Proteobacteria	Alphaproteobacteria	Rhodobacterales	Rhodobacteraceae	Rhodobacter	uncultured_bacterium
ASV_1298	0.37931	0.000339294	no	Bacteria	Bacteroidota	Bacteroidia	Flavobacteriales	Flavobacteriaceae	Flavobacterium	uncultured_bacterium
ASV_1300	0.275862	5.38561690222009e-05	Above	Bacteria	Bdellovibrionota	Oligoflexia	Oligoflexales	uncultured	uncultured	metagenome
ASV_1308	0.310345	0.0005803	no	Bacteria	Bacteroidota	Bacteroidia	Sphingobacteriales	LiUU-11-161	LiUU-11-161	metagenome
ASV_1328	0.37931	0.00027332	Above	Bacteria	Verrucomicrobiota	Verrucomicrobiae	Chthoniobacterales	Terrimicrobiaceae	FukuN18_freshwater_group	metagenome
ASV_1345	0.275862	0.000152144	Above	Bacteria	Bacteroidota	Bacteroidia	Sphingobacteriales	env.OPS_17	env.OPS_17	metagenome
ASV_1369	0.448276	0.000412	Above	Bacteria	Proteobacteria	Gammaproteobacteria	Diplorickettsiales	Diplorickettsiaceae	Aquicella	uncultured_bacterium
ASV_1389	0.482759	0.000430849	Above	Bacteria	Planctomycetota	Phycisphaerae	Phycisphaerales	Phycisphaeraceae	CL500-3	uncultured_bacterium
ASV_1419	0.310345	0.000175033	Above	Bacteria	Verrucomicrobiota	Verrucomicrobiae	Methylacidiphilales	Methylacidiphilaceae	uncultured	metagenome
ASV_1435	0.275862	0.000102327	Above	Bacteria	Proteobacteria	Alphaproteobacteria	Caulobacterales	Hyphomonadaceae	SWB02	uncultured_bacterium
ASV_1447	0.275862	6.0588190149976e-05	Above	Bacteria	Bacteroidota	Kapabacteria	Kapabacteriales	Kapabacteriales	Kapabacteriales	uncultured_bacterium
ASV_1466	0.275862	0.000200614	no	Bacteria	Bacteroidota	Bacteroidia	Chitinophagales	Saprospiraceae	uncultured	uncultured_bacterium
ASV_1474	0.241379	0.000290823	no	Bacteria	Proteobacteria	Alphaproteobacteria	Rhizobiales	Beijerinckiaceae	alphaI_cluster	metagenome
ASV_1485	0.37931	0.000133294	Above	Bacteria	Proteobacteria	Alphaproteobacteria	Caulobacterales	Caulobacteraceae	uncultured	metagenome
ASV_1496	0.344828	0.000185804	Above	Bacteria	Bdellovibrionota	Oligoflexia	Oligoflexales	uncultured	uncultured	uncultured_bacterium
ASV_1508	0.344828	0.000216771	Above	Bacteria	Nitrospirota	Nitrospiria	Nitrospirales	Nitrospiraceae	Nitrospira	uncultured_bacterium
ASV_1517	0.37931	0.000515673	no	Bacteria	Proteobacteria	Alphaproteobacteria	Sphingomonadales	Sphingomonadaceae	Sphingomonas	groundwater_metagenome
ASV_1519	0.37931	0.000464509	no	Bacteria	Proteobacteria	Alphaproteobacteria	Caulobacterales	Caulobacteraceae	Phenylobacterium	metagenome
ASV_1530	0.310345	0.000183111	Above	Bacteria	Planctomycetota	Planctomycetes	Pirellulales	Pirellulaceae	Pirellula	uncultured_bacterium
ASV_1535	0.206897	3.23137014133205e-05	Above	Bacteria	Proteobacteria	Alphaproteobacteria	Rickettsiales	Rickettsiaceae	uncultured	uncultured_bacterium
ASV_1547	0.551724	3.36601056388755e-05	Above	Bacteria	Proteobacteria	Gammaproteobacteria	Burkholderiales	Comamonadaceae	Diaphorobacter	uncultured_bacterium
ASV_1548	0.310345	0.000346026	no	Bacteria	Myxococcota	Polyangia	Polyangiales	Phaselicystidaceae	Phaselicystis	uncultured_bacterium
ASV_1553	0.310345	0.000223503	no	Bacteria	Bacteroidota	Bacteroidia	Flavobacteriales	Crocinitomicaceae	Fluviicola	uncultured_Fluviicola
ASV_1559	0.310345	0.000236967	no	Bacteria	Verrucomicrobiota	Chlamydiae	Chlamydiales	Simkaniaceae	uncultured	Rhabdochlamydiaceae_bacterium
ASV_1569	0.172414	0.000545294	Below	Bacteria	Bacteroidota	Bacteroidia	Chitinophagales	Chitinophagaceae	Edaphobaculum	uncultured_bacterium
ASV_1596	0.275862	0.000161569	Above	Bacteria	Bacteroidota	Bacteroidia	Sphingobacteriales	env.OPS_17	env.OPS_17	uncultured_bacterium
ASV_1606	0.275862	0.000125216	Above	Bacteria	Planctomycetota	Planctomycetes	Planctomycetales	uncultured	uncultured	uncultured_bacterium
ASV_1607	0.448276	0.000216771	Above	Bacteria	Proteobacteria	Gammaproteobacteria	Burkholderiales	Nitrosomonadaceae	uncultured	metagenome
ASV_1614	0.310345	0.000281398	no	Bacteria	Planctomycetota	OM190	OM190	OM190	OM190	uncultured_bacterium
ASV_1618	0.517241	0.000253124	Above	Bacteria	Proteobacteria	Alphaproteobacteria	uncultured	uncultured	uncultured	metagenome
ASV_1648	0.275862	0.00013464	Above	Bacteria	Planctomycetota	Planctomycetes	Planctomycetales	Rubinisphaeraceae	uncultured	uncultured_planctomycete
ASV_1656	0.241379	0.000312366	no	Bacteria	Bacteroidota	Bacteroidia	Flavobacteriales	Crocinitomicaceae	Fluviicola	uncultured_bacterium
ASV_1665	0.172414	0.000148104	no	Bacteria	Acidobacteriota	Vicinamibacteria	Vicinamibacterales	uncultured	uncultured	uncultured_bacterium
ASV_1774	0.275862	0.000266588	no	Bacteria	Myxococcota	Polyangia	Polyangiales	Polyangiaceae	Pajaroellobacter	uncultured_Polyangiaceae
ASV_1788	0.172414	0.000200614	no	Bacteria	Proteobacteria	Alphaproteobacteria	Paracaedibacterales	Paracaedibacteraceae	uncultured	uncultured_bacterium
ASV_1802	0.482759	0.000150797	Above	Bacteria	Bacteroidota	Bacteroidia	Bacteroidetes_VC2.1_Bac22	Bacteroidetes_VC2.1_Bac22	Bacteroidetes_VC2.1_Bac22	uncultured_bacterium
ASV_1849	0.310345	0.000305634	no	Bacteria	Proteobacteria	Alphaproteobacteria	Rhizobiales	Hyphomicrobiaceae	Hyphomicrobium	uncultured_bacterium
ASV_1863	0.275862	0.000253124	no	Bacteria	Proteobacteria	Alphaproteobacteria	Sphingomonadales	Sphingomonadaceae	uncultured	uncultured_bacterium
ASV_1869	0.37931	0.000242353	Above	Bacteria	Bacteroidota	Bacteroidia	Chitinophagales	uncultured	uncultured	uncultured_bacterium
ASV_1870	0.241379	0.000337947	no	Bacteria	Bacteroidota	Bacteroidia	Sphingobacteriales	env.OPS_17	env.OPS_17	metagenome
ASV_1959	0.413793	8.34770619844113e-05	Above	Bacteria	Proteobacteria	Alphaproteobacteria	Rhizobiales	Rhizobiaceae	Allorhizobium-Neorhizobium-Pararhizobium-Rhizobium	uncultured_bacterium
ASV_1973	0.448276	0.000222157	Above	Bacteria	Proteobacteria	Gammaproteobacteria	Coxiellales	Coxiellaceae	Coxiella	uncultured_marine
ASV_1995	0.275862	0.000173686	no	Bacteria	Proteobacteria	Alphaproteobacteria	Caulobacterales	Hyphomonadaceae	uncultured	uncultured_bacterium
ASV_2001	0.413793	0.000192536	Above	Bacteria	Proteobacteria	Gammaproteobacteria	uncultured	uncultured	uncultured	uncultured_organism
ASV_2072	0.137931	4.57777436688707e-05	no	Bacteria	Proteobacteria	Alphaproteobacteria	Rhodospirillales	Rhodospirillaceae	uncultured	uncultured_bacterium
ASV_2095	0.206897	0.000126562	no	Bacteria	Verrucomicrobiota	Verrucomicrobiae	uncultured	uncultured	uncultured	uncultured_bacterium
ASV_2101	0.310345	0.000282745	no	Bacteria	Bacteroidota	Bacteroidia	Chitinophagales	uncultured	uncultured	metagenome
ASV_2107	0.206897	0.000142719	no	Bacteria	Proteobacteria	Alphaproteobacteria	Caulobacterales	Caulobacteraceae	Phenylobacterium	metagenome
ASV_2114	0.310345	0.000188497	Above	Bacteria	Planctomycetota	Planctomycetes	Gemmatales	Gemmataceae	Zavarzinella	uncultured_planctomycete
ASV_2178	0.37931	0.000166954	Above	Bacteria	Proteobacteria	Alphaproteobacteria	Elsterales	Elsteraceae	uncultured	uncultured_bacterium
ASV_2200	0.206897	7.27058281799712e-05	Above	Bacteria	Bacteroidota	Bacteroidia	Bacteroidetes_VC2.1_Bac22	Bacteroidetes_VC2.1_Bac22	Bacteroidetes_VC2.1_Bac22	uncultured_bacterium
ASV_2299	0.103448	7.53986366310812e-05	no	Bacteria	Proteobacteria	Gammaproteobacteria	Legionellales	Legionellaceae	Legionella	uncultured_bacterium
ASV_2452	0.137931	5.52025732477559e-05	no	Bacteria	Proteobacteria	Gammaproteobacteria	Salinisphaerales	Solimonadaceae	uncultured	uncultured_bacterium
ASV_2468	0.344828	3.90457225410956e-05	Above	Bacteria	Proteobacteria	Gammaproteobacteria	Burkholderiales	Comamonadaceae	Hydrogenophaga	uncultured_bacterium
ASV_2475	0.344828	0.000122523	Above	Bacteria	Proteobacteria	Alphaproteobacteria	Defluviicoccales	uncultured	uncultured	metagenome
ASV_2485	0.344828	0.000170993	Above	Bacteria	Bdellovibrionota	Bdellovibrionia	Bdellovibrionales	Bdellovibrionaceae	Bdellovibrio	uncultured_bacterium
ASV_2490	0.172414	4.17385309922057e-05	Above	Bacteria	SAR324_clade(Marine_group_B)	SAR324_clade(Marine_group_B)	SAR324_clade(Marine_group_B)	SAR324_clade(Marine_group_B)	SAR324_clade(Marine_group_B)	uncultured_delta
ASV_2492	0.137931	3.23137014133205e-05	no	Bacteria	Bacteroidota	Bacteroidia	Chitinophagales	Chitinophagaceae	Ferruginibacter	uncultured_Bacteroidetes
ASV_2524	0.310345	0.000165608	Above	Bacteria	Bacteroidota	Bacteroidia	Chitinophagales	uncultured	uncultured	uncultured_bacterium
ASV_2563	0.310345	1.61568507066603e-05	Above	Bacteria	Proteobacteria	Gammaproteobacteria	Burkholderiales	Comamonadaceae	Curvibacter	uncultured_bacterium
ASV_2615	0.206897	0.00015349	no	Bacteria	Bacteroidota	Bacteroidia	Sphingobacteriales	NS11-12_marine_group	NS11-12_marine_group	uncultured_bacterium
ASV_2654	0.0689655	1.61568507066603e-05	no	Bacteria	Spirochaetota	Leptospirae	Leptospirales	Leptospiraceae	Leptospira	uncultured_bacterium
ASV_2682	0.103448	1.61568507066603e-05	no	Bacteria	Proteobacteria	Alphaproteobacteria	Rickettsiales	SM2D12	SM2D12	uncultured_bacterium
ASV_2749	0.344828	5.65489774733109e-05	Above	Bacteria	Bacteroidota	Bacteroidia	Chitinophagales	Saprospiraceae	Candidatus_Aquirestis	uncultured_bacterium
ASV_2842	0.206897	7.53986366310812e-05	Above	Bacteria	Verrucomicrobiota	Verrucomicrobiae	Chthoniobacterales	Chthoniobacteraceae	Chthoniobacter	uncultured_bacterium
ASV_2863	0.103448	2.69280845111004e-05	no	Bacteria	Actinobacteriota	Thermoleophilia	Solirubrobacterales	67-14	67-14	uncultured_bacterium
ASV_2865	0.0689655	4.03921267666506e-06	no	Bacteria	Proteobacteria	Gammaproteobacteria	Burkholderiales	Comamonadaceae	Rhodoferax	uncultured_bacterium
ASV_2908	0.275862	9.15554873377415e-05	Above	Bacteria	Margulisbacteria	Margulisbacteria	Margulisbacteria	Margulisbacteria	Margulisbacteria	uncultured_bacterium
ASV_3098	0.172414	9.55947000144065e-05	no	Bacteria	Bacteroidota	Bacteroidia	Sphingobacteriales	Sphingobacteriaceae	uncultured	uncultured_Sphingobacteriaceae
ASV_3153	0.172414	2.01960633833253e-05	Above	Bacteria	Bdellovibrionota	Bdellovibrionia	Bdellovibrionales	Bdellovibrionaceae	Bdellovibrio	uncultured_bacterium
ASV_3330	0.37931	7.27058281799712e-05	Above	Bacteria	Bdellovibrionota	Bdellovibrionia	Bdellovibrionales	Bdellovibrionaceae	Bdellovibrio	metagenome
ASV_3441	0.172414	3.63529140899856e-05	Above	Bacteria	Proteobacteria	Alphaproteobacteria	Paracaedibacterales	Paracaedibacteraceae	Candidatus_Finniella	Candidatus_Finniella
ASV_3625	0.137931	5.25097647966458e-05	no	Bacteria	Bdellovibrionota	Bdellovibrionia	Bdellovibrionales	Bdellovibrionaceae	Bdellovibrio	uncultured_bacterium
ASV_3729	0.172414	6.1934594375531e-05	no	Bacteria	Bacteroidota	Bacteroidia	Flavobacteriales	NS9_marine_group	NS9_marine_group	metagenome
ASV_3937	0.0689655	4.30849352177607e-05	no	Bacteria	Margulisbacteria	Margulisbacteria	Margulisbacteria	Margulisbacteria	Margulisbacteria	uncultured_bacterium
ASV_4404	0.0689655	4.71241478944257e-05	no	Bacteria	Bdellovibrionota	Oligoflexia	Silvanigrellales	Silvanigrellaceae	Silvanigrella	Spirobacillus_cienkowskii
ASV_4441	0.103448	2.55816802855454e-05	no	Bacteria	Proteobacteria	Gammaproteobacteria	Burkholderiales	Comamonadaceae	Pseudorhodoferax	uncultured_bacterium
ASV_4597	0.137931	3.90457225410956e-05	no	Bacteria	Bdellovibrionota	Bdellovibrionia	Bdellovibrionales	Bdellovibrionaceae	Bdellovibrio	uncultured_bacterium
ASV_4623	0.172414	3.90457225410956e-05	Above	Bacteria	Bdellovibrionota	Bdellovibrionia	Bdellovibrionales	Bdellovibrionaceae	Bdellovibrio	uncultured_bacterium
ASV_4635	0.172414	2.82744887366555e-05	Above	Bacteria	Proteobacteria	Alphaproteobacteria	Rickettsiales	SM2D12	SM2D12	uncultured_bacterium
ASV_5161	0.0689655	4.03921267666506e-06	no	Bacteria	Planctomycetota	Planctomycetes	Pirellulales	Pirellulaceae	uncultured	uncultured_bacterium
ASV_5831	0.0689655	1.61568507066603e-05	no	Bacteria	Fibrobacterota	Fibrobacteria	Fibrobacterales	Fibrobacteraceae	uncultured	metagenome
